# Supplementary material for: The Effect of a Thin metal Layer on the Sensitivity of Refractive Index Measurement by Methods Based on the Total Internal Reflection
Source: MDPI journal article supplement (doi:10.3390/molecules28041944), 2015-03-15
Supplement: s1 [file s1]

# Synthesis and Biological Evaluation of Octahydro-quinazolinones as Phospholipase A2, and Proteanase Inhibitors: Experimental and Theoretical Exploration

Md Afroz Bakht <sup>1,\*</sup>, Thangaiyan Pooventhiran <sup>2,3</sup>, Renjith Thomas <sup>2</sup>, Mehnaz Kamal <sup>4</sup>, Israf Ud Din <sup>1</sup>, Najeeb-Ur-Rahman <sup>5</sup>, Imtiaz Ali <sup>6</sup>, Noushin Ajmal <sup>7</sup>, and Mohamed Jawed Ahsan <sup>8,\*</sup>

<sup>1</sup> Department of Chemistry, College of Science and Humanity Studies, Prince Sattam Bin Abdulaziz University, P.O. Box- 83, Al-Kharj 11942, Saudi Arabia

<sup>2</sup> Department of Chemistry, St Berchmans College (Autonomous), Mahatma Gandhi University, Changanassery, Kerala, India

<sup>3</sup> Department of Mechanical Engineering, University Centre for Research & Development, Chandigarh University, Gharuan, Mohali, Punjab, India

<sup>4</sup> Department of Pharmaceutical Chemistry, College of Pharmacy, Prince Sattam Bin Abdulaziz University, P.O. Box- 83, Al-Kharj 11942, Saudi Arabia

<sup>5</sup> Department of Pharmacology, College of Pharmacy, Prince Sattam Bin Abdulaziz University, P.O. Box- 83, Al-Kharj 11942, Saudi Arabia

<sup>6</sup> Preparatory College, Prince Sattam Bin Abdulaziz University, P.O. Box- 83, Al-Kharj 11942, Saudi Arabia

<sup>7</sup> Department of Basic Science and Humanities, Pratap University, Jaipur, Rajasthan, India

<sup>8</sup> Department of Pharmaceutical Chemistry, Maharishi Arvind College of Pharmacy, Ambabari Circle, Jaipur, Rajasthan 302 039, India

\* Correspondence: Correspondence: m.bakht@psau.edu.sa (M.A.B.); jawedpharma@gmail.com (M.J.A.)

## SUPPLEMENTAL MATERIALS

### Electronic Supplementary Information of Compounds 4a and 4b

Table S1. Cartesian coordination of molecules 4a and 4b.

| Atom. | Atomic number | Coordinates (Angstroms) |         |         |  | Atom | Atomic number | Coordinates (Angstroms) |         |         |
|-------|---------------|-------------------------|---------|---------|--|------|---------------|-------------------------|---------|---------|
|       |               | X                       | Y       | Z       |  |      |               |                         | X       | Y       |
| 4a    |               |                         |         |         |  | 4b   |               |                         |         |         |
| 1     | 6             | -3.0555                 | -0.5885 | -0.4612 |  | 1    | 6             | -3.0017                 | -0.667  | -0.4235 |
| 2     | 6             | -1.8406                 | 0.07533 | -0.2103 |  | 2    | 6             | -1.7851                 | 0.0082  | -0.1848 |
| 3     | 6             | -1.3372                 | 0.16573 | 1.08764 |  | 3    | 6             | -1.3148                 | 0.18542 | 1.12115 |
| 4     | 6             | -2.0632                 | -0.436  | 2.12401 |  | 4    | 6             | -2.0741                 | -0.344  | 2.17855 |
| 5     | 6             | -3.2577                 | -1.0979 | 1.87765 |  | 5    | 6             | -3.272                  | -1.013  | 1.94539 |
| 6     | 6             | -3.766                  | -1.175  | 0.57756 |  | 6    | 6             | -3.7491                 | -1.1753 | 0.63637 |
| 7     | 1             | -3.802                  | -1.5606 | 2.69206 |  | 7    | 1             | -3.8466                 | -1.4175 | 2.78056 |
| 8     | 1             | -4.6994                 | -1.6891 | 0.38959 |  | 8    | 1             | -4.6886                 | -1.698  | 0.4571  |
| 9     | 6             | -0.0444                 | 0.91867 | 1.40655 |  | 9    | 6             | -0.0214                 | 0.94982 | 1.41274 |
| 10    | 6             | 1.20258                 | 0.29934 | 0.80897 |  | 10   | 6             | 1.2216                  | 0.28876 | 0.8528  |
| 11    | 6             | 1.85585                 | 0.89979 | -0.2194 |  | 11   | 6             | 1.99599                 | 0.83258 | -0.3085 |
| 12    | 6             | 1.71923                 | -0.9262 | 1.40548 |  | 12   | 6             | 1.68444                 | -0.9428 | 1.48595 |

|    |   |         |         |         |    |    |         |         |         |
|----|---|---------|---------|---------|----|----|---------|---------|---------|
| 13 | 6 | 0.43947 | 2.89816 | -0.0908 | 13 | 6  | 0.59496 | 2.70714 | -0.1796 |
| 14 | 1 | -0.8833 | 2.87931 | 1.39462 | 14 | 1  | -0.8722 | 2.84    | 1.33053 |
| 15 | 6 | 3.07609 | 0.31575 | -0.8801 | 15 | 6  | 3.10791 | 0.19175 | -0.8209 |
| 16 | 6 | 2.98981 | -1.5195 | 0.80691 | 16 | 6  | 2.93521 | -1.5999 | 0.90736 |
| 17 | 1 | 1.88229 | 2.54781 | -1.487  | 17 | 1  | 1.99306 | 2.36419 | -1.5241 |
| 18 | 6 | 3.21193 | -1.2102 | -0.6867 | 18 | 6  | 3.17331 | -1.3354 | -0.5941 |
| 19 | 1 | 3.05568 | 0.55859 | -1.9495 | 19 | 1  | 3.11961 | 0.41601 | -1.9024 |
| 20 | 1 | 3.82733 | -1.1169 | 1.39273 | 20 | 1  | 3.7938  | -1.2094 | 1.48627 |
| 21 | 8 | -3.4211 | -0.5807 | -1.7867 | 21 | 8  | -3.3232 | -0.7481 | -1.7602 |
| 22 | 8 | -1.1601 | 0.63276 | -1.2541 | 22 | 8  | -1.0708 | 0.48095 | -1.2493 |
| 23 | 1 | -1.6994 | 0.51944 | -2.0491 | 23 | 1  | -1.6003 | 0.2855  | -2.0417 |
| 24 | 6 | -4.6461 | -1.2018 | -2.1588 | 24 | 6  | -4.5386 | -1.3866 | -2.1208 |
| 25 | 1 | -5.4963 | -0.7257 | -1.66   | 25 | 1  | -5.4105 | -0.8703 | -1.6819 |
| 26 | 1 | -4.7357 | -1.0688 | -3.2355 | 26 | 1  | -4.599  | -1.3347 | -3.2158 |
| 27 | 1 | -4.6324 | -2.2707 | -1.923  | 27 | 1  | -4.5471 | -2.4446 | -1.8044 |
| 28 | 7 | 1.44085 | 2.12074 | -0.6869 | 28 | 7  | 1.47355 | 2.06209 | -0.7092 |
| 29 | 7 | -0.1166 | 2.33911 | 1.02003 | 29 | 7  | -0.0757 | 2.35235 | 0.93408 |
| 30 | 8 | 1.19214 | -1.4427 | 2.38439 | 30 | 8  | 1.12354 | -1.4153 | 2.4716  |
| 31 | 8 | 0.16182 | 4.00174 | -0.5272 | 31 | 1  | -1.6961 | -0.2353 | 3.19669 |
| 32 | 1 | -1.664  | -0.3936 | 3.13047 | 32 | 6  | 2.10349 | -2.044  | -1.4493 |
| 33 | 6 | 2.17492 | -1.9558 | -1.5503 | 33 | 1  | 2.3193  | -1.9155 | -2.5234 |
| 34 | 1 | 2.34397 | -1.758  | -2.6134 | 34 | 1  | 2.09316 | -3.1256 | -1.2381 |
| 35 | 1 | 2.25704 | -3.0354 | -1.3953 | 35 | 1  | 1.09426 | -1.6486 | -1.2594 |
| 36 | 1 | 1.15154 | -1.659  | -1.3114 | 36 | 6  | 4.56324 | -1.8517 | -0.9984 |
| 37 | 6 | 4.6237  | -1.6512 | -1.1059 | 37 | 1  | 4.63399 | -2.9412 | -0.8492 |
| 38 | 1 | 4.74779 | -2.7296 | -0.9717 | 38 | 1  | 4.7705  | -1.6452 | -2.0618 |
| 39 | 1 | 4.8103  | -1.4241 | -2.1606 | 39 | 1  | 5.35927 | -1.3784 | -0.4001 |
| 40 | 1 | 5.39259 | -1.149  | -0.5109 | 40 | 1  | 2.87697 | -2.6774 | 1.12545 |
| 41 | 1 | 2.96978 | -2.5966 | 0.99141 | 41 | 1  | 4.01114 | 0.66987 | -0.3974 |
| 42 | 1 | 3.96065 | 0.8197  | -0.4676 | 42 | 1  | 0.07955 | 0.96429 | 2.50945 |
| 43 | 1 | 0.06434 | 0.88058 | 2.4935  | 43 | 16 | 0.33308 | 4.18437 | -1.0001 |

**Table S2.** Physical parameters of molecules **4a** and **4b**.

| Name      | Definition | Values (in Å) |  | Name | Definition   | Values (in °) |
|-----------|------------|---------------|--|------|--------------|---------------|
| <b>4a</b> |            |               |  |      |              |               |
| R1        | R(C1-C2)   | 1.4117        |  | A1   | A(C2-C1-C6)  | 120.547       |
| R2        | R(C1-C6)   | 1.393         |  | A2   | A(C2-C1-O21) | 113.17        |
| R3        | R(C1-O21)  | 1.3772        |  | A3   | A(C6-C1-O21) | 126.283       |
| R4        | R(C2-C3)   | 1.3993        |  | A4   | A(C1-C2-C3)  | 120.534       |

|     |            |        |     |                |         |
|-----|------------|--------|-----|----------------|---------|
| R5  | R(C2-O22)  | 1.3663 | A5  | A(C1-C2-O22)   | 118.963 |
| R6  | R(C3-C4)   | 1.4053 | A6  | A(C3-C2-O22)   | 120.503 |
| R7  | R(C3-C9)   | 1.5304 | A7  | A(C2-C3-C4)    | 118.222 |
| R8  | R(C4-C5)   | 1.3918 | A8  | A(C2-C3-C9)    | 121.677 |
| R9  | R(C4-H32)  | 1.0915 | A9  | A(C4-C3-C9)    | 120.095 |
| R10 | R(C5-C6)   | 1.4027 | A10 | A(C3-C4-C5)    | 121.34  |
| R11 | R(C5-H7)   | 1.0915 | A11 | A(C3-C4-H32)   | 118.506 |
| R12 | R(C6-H8)   | 1.09   | A12 | A(C5-C4-H32)   | 120.146 |
| R13 | R(C9-C10)  | 1.5151 | A13 | A(C4-C5-C6)    | 120.313 |
| R14 | R(C9-N29)  | 1.472  | A14 | A(C4-C5-H7)    | 120.205 |
| R15 | R(C9-H43)  | 1.1014 | A15 | A(C6-C5-H7)    | 119.482 |
| R16 | R(C10-C11) | 1.3629 | A16 | A(C1-C6-C5)    | 119.036 |
| R17 | R(C10-C12) | 1.4601 | A17 | A(C1-C6-H8)    | 120.821 |
| R18 | R(C11-C15) | 1.507  | A18 | A(C5-C6-H8)    | 120.142 |
| R19 | R(C11-N28) | 1.3719 | A19 | A(C3-C9-C10)   | 113.891 |
| R20 | R(C12-C16) | 1.5268 | A20 | A(C3-C9-N29)   | 112.216 |
| R21 | R(C12-O30) | 1.2285 | A21 | A(C3-C9-H43)   | 105.887 |
| R22 | R(C13-N28) | 1.403  | A22 | A(C10-C9-N29)  | 109.387 |
| R23 | R(C13-N29) | 1.3669 | A23 | A(C10-C9-H43)  | 107.368 |
| R24 | R(C13-O31) | 1.2206 | A24 | A(N29-C9-H43)  | 107.745 |
| R25 | R(H14-N29) | 1.0146 | A25 | A(C9-C10-C11)  | 121.058 |
| R26 | R(C15-C18) | 1.5453 | A26 | A(C9-C10-C12)  | 117.893 |
| R27 | R(C15-H19) | 1.1046 | A27 | A(C11-C10-C12) | 121.045 |
| R28 | R(C15-H42) | 1.1062 | A28 | A(C10-C11-C15) | 123.056 |
| R29 | R(C16-C18) | 1.543  | A29 | A(C10-C11-N28) | 120.415 |
| R30 | R(C16-H20) | 1.1067 | A30 | A(C15-C11-N28) | 116.511 |
| R31 | R(C16-H41) | 1.1008 | A31 | A(C10-C12-C16) | 117.284 |
| R32 | R(H17-N28) | 1.0126 | A32 | A(C10-C12-O30) | 121.841 |
| R33 | R(C18-C33) | 1.5421 | A33 | A(C16-C12-O30) | 120.832 |
| R34 | R(C18-C37) | 1.5369 | A34 | A(N28-C13-N29) | 114.27  |
| R35 | R(O21-C24) | 1.4195 | A35 | A(N28-C13-O31) | 120.873 |
| R36 | R(O22-H23) | 0.9728 | A36 | A(N29-C13-O31) | 124.77  |
| R37 | R(C24-H25) | 1.1043 | A37 | A(C11-C15-H18) | 113.267 |
| R38 | R(C24-H26) | 1.0978 | A38 | A(C11-C15-H19) | 109.036 |
| R39 | R(C24-H27) | 1.1043 | A39 | A(C11-C15-H42) | 108.336 |
| R40 | R(C33-H34) | 1.1031 | A40 | A(C18-C15-H19) | 110.117 |
| R41 | R(C33-H35) | 1.1021 | A41 | A(C18-C15-H42) | 109.656 |
| R42 | R(C33-H36) | 1.1004 | A42 | A(H19-C15-H42) | 106.167 |

|     |            |        |     |                |         |
|-----|------------|--------|-----|----------------|---------|
| R43 | R(C37-H38) | 1.102  | A43 | A(C12-C16-C18) | 114.92  |
| R44 | R(C37-H39) | 1.1029 | A44 | A(C12-C16-H20) | 106.584 |
| R45 | R(C37-H40) | 1.1025 | A45 | A(C12-C16-H41) | 107.629 |
|     |            |        | A46 | A(C18-C16-H20) | 109.193 |
|     |            |        | A47 | A(C18-C16-H41) | 111.639 |
|     |            |        | A48 | A(H20-C16-H41) | 106.43  |
|     |            |        | A49 | A(C15-C18-C16) | 107.805 |
|     |            |        | A50 | A(C15-C18-C33) | 110.082 |
|     |            |        | A51 | A(C15-C18-C37) | 109.369 |
|     |            |        | A52 | A(C16-C18-C33) | 110.72  |
|     |            |        | A53 | A(C16-C18-C37) | 109.752 |
|     |            |        | A54 | A(C33-C18-C37) | 109.093 |
|     |            |        | A55 | A(C1-O21-C24)  | 118.223 |
|     |            |        | A56 | A(C2-O22-H23)  | 106.296 |
|     |            |        | A57 | A(O21-C24-H25) | 111.394 |
|     |            |        | A58 | A(O21-C24-H26) | 106.211 |
|     |            |        | A59 | A(O21-C24-H27) | 111.39  |
|     |            |        | A60 | A(H25-C24-H26) | 109.327 |
|     |            |        | A61 | A(H25-C24-H27) | 109.142 |
|     |            |        | A62 | A(H26-C24-H27) | 109.31  |
|     |            |        | A63 | A(C11-N28-C13) | 124.353 |
|     |            |        | A64 | A(C11-N28-H17) | 121.21  |
|     |            |        | A65 | A(C13-N28-H17) | 114.422 |
|     |            |        | A66 | A(C9-N29-C13)  | 126.16  |
|     |            |        | A67 | A(C9-N29-H14)  | 116.947 |
|     |            |        | A68 | A(C13-N29-H14) | 112.608 |
|     |            |        | A69 | A(C18-C33-H34) | 110.533 |
|     |            |        | A70 | A(C18-C33-H35) | 110.562 |
|     |            |        | A71 | A(C18-C33-H36) | 112.049 |
|     |            |        | A72 | A(H34-C33-H35) | 107.626 |
|     |            |        | A73 | A(H34-C33-H36) | 107.792 |
|     |            |        | A74 | A(H35-C33-H36) | 108.119 |
|     |            |        | A75 | A(C18-C37-H38) | 110.769 |
|     |            |        | A76 | A(C18-C37-H39) | 111.144 |
|     |            |        | A77 | A(C18-C37-H40) | 111.468 |
|     |            |        | A78 | A(H38-C37-H39) | 107.673 |
|     |            |        | A79 | A(H38-C37-H40) | 107.735 |
|     |            |        | A80 | A(H39-C37-H40) | 107.887 |

| 4b  |            |        |     |                |         |
|-----|------------|--------|-----|----------------|---------|
| R1  | R(C1-C2)   | 1.4121 | A1  | A(C2-C1-C6)    | 120.509 |
| R2  | R(C1-C6)   | 1.3929 | A2  | A(C2-C1-O21)   | 113.149 |
| R3  | R(C1-O21)  | 1.376  | A3  | A(C6-C1-O21)   | 126.342 |
| R4  | R(C2-C3)   | 1.3993 | A4  | A(C1-C2-C3)    | 120.438 |
| R5  | R(C2-O22)  | 1.3648 | A5  | A(C1-C2-O22)   | 119.116 |
| R6  | R(C3-C4)   | 1.4054 | A6  | A(C3-C2-O22)   | 120.446 |
| R7  | R(C3-C9)   | 1.528  | A7  | A(C2-C3-C4)    | 118.379 |
| R8  | R(C4-C5)   | 1.3914 | A8  | A(C2-C3-C9)    | 121.527 |
| R9  | R(C4-H31)  | 1.0915 | A9  | A(C4-C3-C9)    | 120.089 |
| R10 | R(C5-C6)   | 1.4029 | A10 | A(C3-C4-C5)    | 121.24  |
| R11 | R(C5-H7)   | 1.0914 | A11 | A(C3-C4-H31)   | 118.582 |
| R12 | R(C6-H8)   | 1.0899 | A12 | A(C5-C4-H31)   | 120.171 |
| R13 | R(C9-C10)  | 1.5136 | A13 | A(C4-C5-C6)    | 120.302 |
| R14 | R(C9-N29)  | 1.4762 | A14 | A(C4-C5-H7)    | 120.207 |
| R15 | R(C9-H42)  | 1.1013 | A15 | A(C6-C5-H7)    | 119.491 |
| R16 | R(C10-C11) | 1.3612 | A16 | A(C1-C6-C5)    | 119.122 |
| R17 | R(C10-C12) | 1.4615 | A17 | A(C1-C6-H8)    | 120.769 |
| R18 | R(C11-C15) | 1.506  | A18 | A(C5-C6-H8)    | 120.108 |
| R19 | R(C11-N28) | 1.3764 | A19 | A(C3-C9-C10)   | 114.334 |
| R20 | R(C12-C16) | 1.5261 | A20 | A(C3-C9-N29)   | 111.608 |
| R21 | R(C12-O30) | 1.2279 | A21 | A(C3-C9-H42)   | 106.122 |
| R22 | R(C13-N28) | 1.3828 | A22 | A(C10-C9-N29)  | 109.156 |
| R23 | R(C13-N29) | 1.3492 | A23 | A(C10-C9-H42)  | 107.745 |
| R24 | R(C13-S43) | 1.6786 | A24 | A(N29-C9-H42)  | 107.552 |
| R25 | R(H14-N29) | 1.0144 | A25 | A(C9-C10-C11)  | 121.022 |
| R26 | R(C15-C18) | 1.5457 | A26 | A(C9-C10-C12)  | 117.921 |
| R27 | R(C15-H19) | 1.1044 | A27 | A(C11-C10-C12) | 121.05  |
| R28 | R(C15-H41) | 1.1062 | A28 | A(C10-C11-C15) | 123.224 |
| R29 | R(C16-C18) | 1.5437 | A29 | A(C10-C11-N28) | 120.283 |
| R30 | R(C16-H20) | 1.1068 | A30 | A(C15-C11-N28) | 116.466 |
| R31 | R(C16-H40) | 1.1008 | A31 | A(C10-C12-C16) | 117.201 |
| R32 | R(H17-N28) | 1.0129 | A32 | A(C10-1C2-O30) | 121.663 |
| R33 | R(C18-C32) | 1.542  | A33 | A(C16-C12-O30) | 121.091 |
| R34 | R(C18-C36) | 1.5368 | A34 | A(N28-C13-N29) | 115.152 |
| R35 | R(O21-C24) | 1.42   | A35 | A(N28-C13-S43) | 120.55  |
| R36 | R(O22-H23) | 0.9729 | A36 | A(N29-C13-S43) | 124.252 |
| R37 | R(C24-H25) | 1.1042 | A37 | A(C11-C15-C18) | 113.101 |
| R38 | R(C24-H26) | 1.0977 | A38 | A(C11-C15-H19) | 109.177 |

|     |            |        |     |                |         |
|-----|------------|--------|-----|----------------|---------|
| R39 | R(C24-H27) | 1.1042 | A39 | A(C11-C15-H41) | 108.349 |
| R40 | R(C32-H33) | 1.103  | A40 | A(C18-C15-H19) | 110.092 |
| R41 | R(C32-H34) | 1.102  | A41 | A(C18-C15-H41) | 109.663 |
| R42 | R(C32-H35) | 1.1004 | A42 | A(H19-C15-H41) | 106.213 |
| R43 | R(C36-H37) | 1.1019 | A43 | A(C12-C16-C18) | 115.017 |
| R44 | R(C36-H38) | 1.1028 | A44 | A(C12-C16-H20) | 106.497 |
| R45 | R(C36-H39) | 1.1025 | A45 | A(C12-C16-H40) | 107.65  |
|     |            |        | A46 | A(C18-C16-H20) | 109.235 |
|     |            |        | A47 | A(C18-C16-H40) | 111.623 |
|     |            |        | A48 | A(H20-C16-H40) | 106.354 |
|     |            |        | A49 | A(C15-C18-C16) | 107.88  |
|     |            |        | A50 | A(C15-C18-C32) | 110.03  |
|     |            |        | A51 | A(C15-C18-C36) | 109.351 |
|     |            |        | A52 | A(C16-C18-C32) | 110.748 |
|     |            |        | A53 | A(C16-C18-C36) | 109.707 |
|     |            |        | A54 | A(C32-C18-C36) | 109.104 |
|     |            |        | A55 | A(C1-O21-C24)  | 118.237 |
|     |            |        | A56 | A(C2-O22-H23)  | 106.468 |
|     |            |        | A57 | A(O21-C24-H25) | 111.376 |
|     |            |        | A58 | A(O21-C24-H26) | 106.186 |
|     |            |        | A59 | A(O21-C24-H27) | 111.36  |
|     |            |        | A60 | A(H25-C24-H26) | 109.341 |
|     |            |        | A61 | A(H25-C24-H27) | 109.189 |
|     |            |        | A62 | A(H26-C24-H27) | 109.321 |
|     |            |        | A63 | A(C11-N28-C13) | 124.224 |
|     |            |        | A64 | A(C11-N28-C17) | 120.987 |
|     |            |        | A65 | A(C13-N28-C17) | 114.687 |
|     |            |        | A66 | A(C9-N29-C13)  | 126.834 |
|     |            |        | A67 | A(C9-N29-H14)  | 117.292 |
|     |            |        | A68 | A(C13-N29-H14) | 113.869 |
|     |            |        | A69 | A(C18-C32-H33) | 110.488 |
|     |            |        | A70 | A(C18-C32-H34) | 110.575 |
|     |            |        | A71 | A(C18-C32-H35) | 112.087 |
|     |            |        | A72 | A(H33-C32-H34) | 107.63  |
|     |            |        | A73 | A(H33-C32-H35) | 107.757 |
|     |            |        | A74 | A(H34-C32-H35) | 108.144 |
|     |            |        | A75 | A(C18-C36-H37) | 110.718 |
|     |            |        | A76 | A(C18-C36-H38) | 111.132 |
|     |            |        | A77 | A(C18-C36-H39) | 111.497 |

|  |  |  |  |     |                |         |
|--|--|--|--|-----|----------------|---------|
|  |  |  |  | A78 | A(H37-C36-H38) | 107.689 |
|  |  |  |  | A79 | A(H37-C36-H39) | 107.748 |
|  |  |  |  | A80 | A(H38-C36-H39) | 107.895 |

**Table S3.** Natural atomic orbital occupancies of molecules **4a** and **4b**.

| NAO       | Atom | No. | lang  | Type (AO) | Occupancy | Energy  | NAO | Atom | No. | lang | Type (AO) | Occupancy | Energy  |
|-----------|------|-----|-------|-----------|-----------|---------|-----|------|-----|------|-----------|-----------|---------|
| <b>4a</b> |      |     |       |           |           |         |     |      |     |      |           |           |         |
| 1         | C    | 1   | S     | Cor( 1S)  | 1.99859   | -10.119 | 217 | H    | 19  | S    | Val( 1S)  | 0.76015   | 0.05047 |
| 2         | C    | 1   | S     | Val( 2S)  | 0.82336   | -0.1117 | 218 | H    | 19  | S    | Ryd( 2S)  | 0.00269   | 0.41442 |
| 3         | C    | 1   | S     | Ryd( 3S)  | 0.00191   | 1.03822 | 219 | H    | 19  | px   | Ryd( 2p)  | 0.0002    | 1.80053 |
| 4         | C    | 1   | px    | Val( 2p)  | 1.05449   | -0.0722 | 220 | H    | 19  | py   | Ryd( 2p)  | 0.00012   | 1.74527 |
| 5         | C    | 1   | px    | Ryd( 3p)  | 0.00327   | 0.79017 | 221 | H    | 19  | pz   | Ryd( 2p)  | 0.00082   | 2.16275 |
| 6         | C    | 1   | py    | Val( 2p)  | 1.0551    | -0.1039 |     |      |     |      |           |           |         |
| 7         | C    | 1   | py    | Ryd( 3p)  | 0.00172   | 0.65241 | 222 | H    | 20  | S    | Val( 1S)  | 0.75191   | 0.06611 |
| 8         | C    | 1   | pz    | Val( 2p)  | 0.77353   | -0.0217 | 223 | H    | 20  | S    | Ryd( 2S)  | 0.00204   | 0.4173  |
| 9         | C    | 1   | pz    | Ryd( 3p)  | 0.0093    | 0.78011 | 224 | H    | 20  | px   | Ryd( 2p)  | 0.00057   | 2.01463 |
| 10        | C    | 1   | dxy   | Ryd( 3d)  | 0.00066   | 1.88443 | 225 | H    | 20  | py   | Ryd( 2p)  | 0.00031   | 1.84115 |
| 11        | C    | 1   | dxz   | Ryd( 3d)  | 0.00154   | 1.91036 | 226 | H    | 20  | pz   | Ryd( 2p)  | 0.00035   | 1.89954 |
| 12        | C    | 1   | dyz   | Ryd( 3d)  | 0.00229   | 1.63171 |     |      |     |      |           |           |         |
| 13        | C    | 1   | dx2y2 | Ryd( 3d)  | 0.00086   | 1.62539 | 227 | O    | 21  | S    | Cor( 1S)  | 1.99972   | -18.986 |
| 14        | C    | 1   | dz2   | Ryd( 3d)  | 0.00192   | 2.05133 | 228 | O    | 21  | S    | Val( 2S)  | 1.59322   | -0.8846 |
|           |      |     |       |           |           |         | 229 | O    | 21  | S    | Ryd( 3S)  | 0.00038   | 2.11105 |
| 15        | C    | 2   | S     | Cor( 1S)  | 1.9985    | -10.114 | 230 | O    | 21  | px   | Val( 2p)  | 1.61702   | -0.3317 |
| 16        | C    | 2   | S     | Val( 2S)  | 0.81251   | -0.0963 | 231 | O    | 21  | px   | Ryd( 3p)  | 0.0016    | 1.3739  |
| 17        | C    | 2   | S     | Ryd( 3S)  | 0.00183   | 1.12352 | 232 | O    | 21  | py   | Val( 2p)  | 1.80023   | -0.3272 |
| 18        | C    | 2   | px    | Val( 2p)  | 0.9695    | -0.0554 | 233 | O    | 21  | py   | Ryd( 3p)  | 0.00214   | 1.16324 |
| 19        | C    | 2   | px    | Ryd( 3p)  | 0.00651   | 0.81809 | 234 | O    | 21  | pz   | Val( 2p)  | 1.55893   | -0.3366 |
| 20        | C    | 2   | py    | Val( 2p)  | 0.97896   | -0.0931 | 235 | O    | 21  | pz   | Ryd( 3p)  | 0.00175   | 1.19214 |
| 21        | C    | 2   | py    | Ryd( 3p)  | 0.00298   | 0.66551 | 236 | O    | 21  | dxy  | Ryd( 3d)  | 0.00065   | 2.84831 |
| 22        | C    | 2   | pz    | Val( 2p)  | 0.88862   | -0.0341 | 237 | O    | 21  | dxz  | Ryd( 3d)  | 0.00073   | 2.90696 |
| 23        | C    | 2   | pz    | Ryd( 3p)  | 0.0065    | 0.77358 | 238 | O    | 21  | dyz  | Ryd( 3d)  | 0.00068   | 2.77082 |



|    |   |   |       |          |         |         |     |   |    |       |          |         |         |
|----|---|---|-------|----------|---------|---------|-----|---|----|-------|----------|---------|---------|
| 24 | C | 2 | dxy   | Ryd( 3d) | 0.00097 | 1.87664 | 239 | O | 21 | dx2y2 | Ryd( 3d) | 0.00057 | 2.77096 |
| 25 | C | 2 | dxz   | Ryd( 3d) | 0.00189 | 1.97459 | 240 | O | 21 | dz2   | Ryd( 3d) | 0.00125 | 3.09021 |
| 26 | C | 2 | dyz   | Ryd( 3d) | 0.00218 | 1.66421 |     |   |    |       |          |         |         |
| 27 | C | 2 | dx2y2 | Ryd( 3d) | 0.00137 | 1.63536 | 241 | O | 22 | S     | Cor( 1S) | 1.99977 | -18.969 |
| 28 | C | 2 | dz2   | Ryd( 3d) | 0.00157 | 2.04515 | 242 | O | 22 | S     | Val( 2S) | 1.65853 | -0.9018 |
|    |   |   |       |          |         |         | 243 | O | 22 | S     | Ryd( 3S) | 0.00015 | 2.23055 |
| 29 | C | 3 | S     | Cor( 1S) | 1.99882 | -10.047 | 244 | O | 22 | px    | Val( 2p) | 1.75205 | -0.3262 |
| 30 | C | 3 | S     | Val( 2S) | 0.87806 | -0.112  | 245 | O | 22 | px    | Ryd( 3p) | 0.00139 | 1.24886 |
| 31 | C | 3 | S     | Ryd( 3S) | 0.00196 | 1.08551 | 246 | O | 22 | py    | Val( 2p) | 1.83307 | -0.3171 |
| 32 | C | 3 | px    | Val( 2p) | 1.0594  | -0.0583 | 247 | O | 22 | py    | Ryd( 3p) | 0.00177 | 1.11072 |
| 33 | C | 3 | px    | Ryd( 3p) | 0.00666 | 0.97842 | 248 | O | 22 | pz    | Val( 2p) | 1.4462  | -0.3031 |
| 34 | C | 3 | py    | Val( 2p) | 1.05795 | -0.0821 | 249 | O | 22 | pz    | Ryd( 3p) | 0.00229 | 1.23896 |
| 35 | C | 3 | py    | Ryd( 3p) | 0.0035  | 0.76841 | 250 | O | 22 | dxy   | Ryd( 3d) | 0.0011  | 2.87453 |
| 36 | C | 3 | pz    | Val( 2p) | 1.08588 | -0.0436 | 251 | O | 22 | dxz   | Ryd( 3d) | 0.00129 | 3.22951 |
| 37 | C | 3 | pz    | Ryd( 3p) | 0.00458 | 0.98411 | 252 | O | 22 | dyz   | Ryd( 3d) | 0.00041 | 2.87488 |
| 38 | C | 3 | dxy   | Ryd( 3d) | 0.0006  | 1.88066 | 253 | O | 22 | dx2y2 | Ryd( 3d) | 0.0012  | 2.80949 |
| 39 | C | 3 | dxz   | Ryd( 3d) | 0.00073 | 1.98049 | 254 | O | 22 | dz2   | Ryd( 3d) | 0.00042 | 3.06286 |
| 40 | C | 3 | dyz   | Ryd( 3d) | 0.00072 | 1.71894 |     |   |    |       |          |         |         |
| 41 | C | 3 | dx2y2 | Ryd( 3d) | 0.00073 | 1.65864 | 255 | H | 23 | S     | Val( 1S) | 0.50237 | 0.09804 |
| 42 | C | 3 | dz2   | Ryd( 3d) | 0.00062 | 2.11151 | 256 | H | 23 | S     | Ryd( 2S) | 0.00298 | 0.43606 |
|    |   |   |       |          |         |         | 257 | H | 23 | px    | Ryd( 2p) | 0.00154 | 1.93053 |
| 43 | C | 4 | S     | Cor( 1S) | 1.99891 | -10.041 | 258 | H | 23 | py    | Ryd( 2p) | 0.00153 | 1.60089 |
| 44 | C | 4 | S     | Val( 2S) | 0.94635 | -0.1283 | 259 | H | 23 | pz    | Ryd( 2p) | 0.00203 | 2.1695  |
| 45 | C | 4 | S     | Ryd( 3S) | 0.00113 | 1.06522 |     |   |    |       |          |         |         |
| 46 | C | 4 | px    | Val( 2p) | 1.06201 | -0.0414 | 260 | C | 24 | S     | Cor( 1S) | 1.99935 | -10.153 |
| 47 | C | 4 | px    | Ryd( 3p) | 0.00339 | 0.71964 | 261 | C | 24 | S     | Val( 2S) | 1.10755 | -0.2852 |
| 48 | C | 4 | py    | Val( 2p) | 1.0221  | -0.0747 | 262 | C | 24 | S     | Ryd( 3S) | 0.00157 | 1.07388 |
| 49 | C | 4 | py    | Ryd( 3p) | 0.00181 | 0.61015 | 263 | C | 24 | px    | Val( 2p) | 0.84494 | -0.0781 |

|    |   |   |       |          |         |         |     |   |    |       |          |         |         |
|----|---|---|-------|----------|---------|---------|-----|---|----|-------|----------|---------|---------|
| 50 | C | 4 | pz    | Val( 2p) | 1.16945 | -0.042  | 264 | C | 24 | px    | Ryd( 3p) | 0.00248 | 0.4755  |
| 51 | C | 4 | pz    | Ryd( 3p) | 0.00617 | 0.95081 | 265 | C | 24 | py    | Val( 2p) | 1.10606 | -0.095  |
| 52 | C | 4 | dxy   | Ryd( 3d) | 0.00047 | 1.9024  | 266 | C | 24 | py    | Ryd( 3p) | 0.00102 | 0.50676 |
| 53 | C | 4 | dxz   | Ryd( 3d) | 0.00061 | 1.97508 | 267 | C | 24 | pz    | Val( 2p) | 1.17985 | -0.1068 |
| 54 | C | 4 | dyz   | Ryd( 3d) | 0.00054 | 1.64605 | 268 | C | 24 | pz    | Ryd( 3p) | 0.003   | 0.68883 |
| 55 | C | 4 | dx2y2 | Ryd( 3d) | 0.00062 | 1.66916 | 269 | C | 24 | dxy   | Ryd( 3d) | 0.00156 | 1.72068 |
| 56 | C | 4 | dz2   | Ryd( 3d) | 0.00052 | 2.10824 | 270 | C | 24 | dxz   | Ryd( 3d) | 0.00101 | 1.70258 |
|    |   |   |       |          |         |         | 271 | C | 24 | dyz   | Ryd( 3d) | 0.00053 | 1.65852 |
| 57 | C | 5 | S     | Cor( 1S) | 1.99899 | -10.046 | 272 | C | 24 | dx2y2 | Ryd( 3d) | 0.00166 | 1.75829 |
| 58 | C | 5 | S     | Val( 2S) | 0.95143 | -0.1367 | 273 | C | 24 | dz2   | Ryd( 3d) | 0.00099 | 1.90744 |
| 59 | C | 5 | S     | Ryd( 3S) | 0.00096 | 1.02193 |     |   |    |       |          |         |         |
| 60 | C | 5 | px    | Val( 2p) | 1.0894  | -0.0464 | 274 | H | 25 | S     | Val( 1S) | 0.80514 | 0.03135 |
| 61 | C | 5 | px    | Ryd( 3p) | 0.004   | 0.70442 | 275 | H | 25 | S     | Ryd( 2S) | 0.00275 | 0.36379 |
| 62 | C | 5 | py    | Val( 2p) | 1.0547  | -0.0794 | 276 | H | 25 | px    | Ryd( 2p) | 0.00053 | 1.95401 |
| 63 | C | 5 | py    | Ryd( 3p) | 0.00225 | 0.62806 | 277 | H | 25 | py    | Ryd( 2p) | 0.00038 | 1.73045 |
| 64 | C | 5 | pz    | Val( 2p) | 1.1217  | -0.0359 | 278 | H | 25 | pz    | Ryd( 2p) | 0.00033 | 1.73216 |
| 65 | C | 5 | pz    | Ryd( 3p) | 0.00515 | 0.84938 |     |   |    |       |          |         |         |
| 66 | C | 5 | dxy   | Ryd( 3d) | 0.00045 | 1.84951 | 279 | H | 26 | S     | Val( 1S) | 0.78549 | 0.04699 |
| 67 | C | 5 | dxz   | Ryd( 3d) | 0.00062 | 2.05832 | 280 | H | 26 | S     | Ryd( 2S) | 0.00081 | 0.31147 |
| 68 | C | 5 | dyz   | Ryd( 3d) | 0.00058 | 1.69314 | 281 | H | 26 | px    | Ryd( 2p) | 0.0001  | 1.58937 |
| 69 | C | 5 | dx2y2 | Ryd( 3d) | 0.00057 | 1.62623 | 282 | H | 26 | py    | Ryd( 2p) | 0.00021 | 1.61184 |
| 70 | C | 5 | dz2   | Ryd( 3d) | 0.00053 | 1.98215 | 283 | H | 26 | pz    | Ryd( 2p) | 0.00088 | 2.16404 |
|    |   |   |       |          |         |         |     |   |    |       |          |         |         |
| 71 | C | 6 | S     | Cor( 1S) | 1.99892 | -10.053 | 284 | H | 27 | S     | Val( 1S) | 0.80538 | 0.03125 |
| 72 | C | 6 | S     | Val( 2S) | 0.95672 | -0.1475 | 285 | H | 27 | S     | Ryd( 2S) | 0.00273 | 0.36477 |
| 73 | C | 6 | S     | Ryd( 3S) | 0.00104 | 1.01945 | 286 | H | 27 | px    | Ryd( 2p) | 0.00014 | 1.59655 |
| 74 | C | 6 | px    | Val( 2p) | 1.15958 | -0.0707 | 287 | H | 27 | py    | Ryd( 2p) | 0.00082 | 2.12171 |
| 75 | C | 6 | px    | Ryd( 3p) | 0.00417 | 0.86888 | 288 | H | 27 | pz    | Ryd( 2p) | 0.00029 | 1.69791 |

|     |   |    |       |          |         |         |
|-----|---|----|-------|----------|---------|---------|
| 76  | C | 6  | py    | Val( 2p) | 1.09287 | -0.0953 |
| 77  | C | 6  | py    | Ryd( 3p) | 0.00223 | 0.65911 |
| 78  | C | 6  | pz    | Val( 2p) | 1.08071 | -0.0443 |
| 79  | C | 6  | pz    | Ryd( 3p) | 0.00315 | 0.69787 |
| 80  | C | 6  | dxy   | Ryd( 3d) | 0.00038 | 1.8815  |
| 81  | C | 6  | dxz   | Ryd( 3d) | 0.00067 | 1.91745 |
| 82  | C | 6  | dyz   | Ryd( 3d) | 0.00073 | 1.65491 |
| 83  | C | 6  | dx2y2 | Ryd( 3d) | 0.00052 | 1.62434 |
| 84  | C | 6  | dz2   | Ryd( 3d) | 0.00041 | 2.15611 |
|     |   |    |       |          |         |         |
| 85  | H | 7  | S     | Val( 1S) | 0.76747 | 0.08321 |
| 86  | H | 7  | S     | Ryd( 2S) | 0.00172 | 0.32591 |
| 87  | H | 7  | px    | Ryd( 2p) | 0.00034 | 1.93598 |
| 88  | H | 7  | py    | Ryd( 2p) | 0.00032 | 1.7071  |
| 89  | H | 7  | pz    | Ryd( 2p) | 0.00057 | 2.11209 |
|     |   |    |       |          |         |         |
| 90  | H | 8  | S     | Val( 1S) | 0.76551 | 0.06814 |
| 91  | H | 8  | S     | Ryd( 2S) | 0.00156 | 0.34978 |
| 92  | H | 8  | px    | Ryd( 2p) | 0.00072 | 2.06335 |
| 93  | H | 8  | py    | Ryd( 2p) | 0.0004  | 1.72437 |
| 94  | H | 8  | pz    | Ryd( 2p) | 0.0001  | 1.97006 |
|     |   |    |       |          |         |         |
| 95  | C | 9  | S     | Cor( 1S) | 1.99901 | -10.103 |
| 96  | C | 9  | S     | Val( 2S) | 0.92516 | -0.1802 |
| 97  | C | 9  | S     | Ryd( 3S) | 0.0014  | 1.51636 |
| 98  | C | 9  | px    | Val( 2p) | 1.04706 | -0.0754 |
| 99  | C | 9  | px    | Ryd( 3p) | 0.00259 | 0.61256 |
| 100 | C | 9  | py    | Val( 2p) | 0.84601 | -0.0562 |
|     |   |    |       |          |         |         |
| 289 | N | 28 | S     | Cor( 1S) | 1.99914 | -14.206 |
| 290 | N | 28 | S     | Val( 2S) | 1.25807 | -0.5369 |
| 291 | N | 28 | S     | Ryd( 3S) | 0.00114 | 1.74609 |
| 292 | N | 28 | px    | Val( 2p) | 1.49551 | -0.2603 |
| 293 | N | 28 | px    | Ryd( 3p) | 0.00268 | 1.13186 |
| 294 | N | 28 | py    | Val( 2p) | 1.40506 | -0.2578 |
| 295 | N | 28 | py    | Ryd( 3p) | 0.00212 | 1.13886 |
| 296 | N | 28 | pz    | Val( 2p) | 1.49293 | -0.2572 |
| 297 | N | 28 | pz    | Ryd( 3p) | 0.00317 | 1.17796 |
| 298 | N | 28 | dxy   | Ryd( 3d) | 0.00056 | 2.38362 |
| 299 | N | 28 | dxz   | Ryd( 3d) | 0.00047 | 2.36145 |
| 300 | N | 28 | dyz   | Ryd( 3d) | 0.00055 | 2.42182 |
| 301 | N | 28 | dx2y2 | Ryd( 3d) | 0.00046 | 2.23195 |
| 302 | N | 28 | dz2   | Ryd( 3d) | 0.00036 | 2.21801 |
|     |   |    |       |          |         |         |
| 303 | N | 29 | S     | Cor( 1S) | 1.99929 | -14.189 |
| 304 | N | 29 | S     | Val( 2S) | 1.28007 | -0.5314 |
| 305 | N | 29 | S     | Ryd( 3S) | 0.0014  | 1.67056 |
| 306 | N | 29 | px    | Val( 2p) | 1.54452 | -0.2333 |
| 307 | N | 29 | px    | Ryd( 3p) | 0.00363 | 1.14966 |
| 308 | N | 29 | py    | Val( 2p) | 1.36784 | -0.2253 |
| 309 | N | 29 | py    | Ryd( 3p) | 0.00226 | 1.15948 |
| 310 | N | 29 | pz    | Val( 2p) | 1.48965 | -0.2425 |
| 311 | N | 29 | pz    | Ryd( 3p) | 0.00188 | 1.05461 |
| 312 | N | 29 | dxy   | Ryd( 3d) | 0.00053 | 2.38361 |
| 313 | N | 29 | dxz   | Ryd( 3d) | 0.00052 | 2.32997 |
| 314 | N | 29 | dyz   | Ryd( 3d) | 0.00044 | 2.3491  |

|     |   |    |       |          |         |         |     |   |    |       |          |         |         |
|-----|---|----|-------|----------|---------|---------|-----|---|----|-------|----------|---------|---------|
| 101 | C | 9  | py    | Ryd( 3p) | 0.00637 | 0.65642 | 315 | N | 29 | dx2y2 | Ryd( 3d) | 0.00041 | 2.3334  |
| 102 | C | 9  | pz    | Val( 2p) | 1.19258 | -0.095  | 316 | N | 29 | dz2   | Ryd( 3d) | 0.00086 | 2.2921  |
| 103 | C | 9  | pz    | Ryd( 3p) | 0.01156 | 0.9675  |     |   |    |       |          |         |         |
| 104 | C | 9  | dxy   | Ryd( 3d) | 0.00111 | 1.91198 | 317 | O | 30 | S     | Cor( 1S) | 1.9998  | -18.846 |
| 105 | C | 9  | dxz   | Ryd( 3d) | 0.00056 | 1.89614 | 318 | O | 30 | S     | Val( 2S) | 1.69244 | -0.8618 |
| 106 | C | 9  | dyz   | Ryd( 3d) | 0.00097 | 1.77473 | 319 | O | 30 | S     | Ryd( 3S) | 0.00045 | 2.1155  |
| 107 | C | 9  | dx2y2 | Ryd( 3d) | 0.00176 | 1.87709 | 320 | O | 30 | px    | Val( 2p) | 1.65299 | -0.2391 |
| 108 | C | 9  | dz2   | Ryd( 3d) | 0.00118 | 2.13667 | 321 | O | 30 | px    | Ryd( 3p) | 0.00169 | 1.18759 |
|     |   |    |       |          |         |         | 322 | O | 30 | py    | Val( 2p) | 1.70538 | -0.2381 |
| 109 | C | 10 | S     | Cor( 1S) | 1.99868 | -10.037 | 323 | O | 30 | py    | Ryd( 3p) | 0.0019  | 1.18927 |
| 110 | C | 10 | S     | Val( 2S) | 0.87691 | -0.1086 | 324 | O | 30 | pz    | Val( 2p) | 1.53272 | -0.2646 |
| 111 | C | 10 | S     | Ryd( 3S) | 0.00243 | 1.19142 | 325 | O | 30 | pz    | Ryd( 3p) | 0.00059 | 1.06853 |
| 112 | C | 10 | px    | Val( 2p) | 1.08759 | -0.0686 | 326 | O | 30 | dxy   | Ryd( 3d) | 0.00059 | 2.81898 |
| 113 | C | 10 | px    | Ryd( 3p) | 0.00574 | 0.9277  | 327 | O | 30 | dxz   | Ryd( 3d) | 0.00098 | 3.07582 |
| 114 | C | 10 | py    | Val( 2p) | 1.11947 | -0.0742 | 328 | O | 30 | dyz   | Ryd( 3d) | 0.00099 | 3.02434 |
| 115 | C | 10 | py    | Ryd( 3p) | 0.00467 | 0.95161 | 329 | O | 30 | dx2y2 | Ryd( 3d) | 0.0005  | 2.80708 |
| 116 | C | 10 | pz    | Val( 2p) | 1.11298 | -0.0725 | 330 | O | 30 | dz2   | Ryd( 3d) | 0.00157 | 2.98672 |
| 117 | C | 10 | pz    | Ryd( 3p) | 0.00387 | 0.8705  |     |   |    |       |          |         |         |
| 118 | C | 10 | dxy   | Ryd( 3d) | 0.00122 | 1.60926 | 331 | O | 31 | S     | Cor( 1S) | 1.9998  | -18.845 |
| 119 | C | 10 | dxz   | Ryd( 3d) | 0.00093 | 1.69192 | 332 | O | 31 | S     | Val( 2S) | 1.70036 | -0.8586 |
| 120 | C | 10 | dyz   | Ryd( 3d) | 0.00094 | 1.69027 | 333 | O | 31 | S     | Ryd( 3S) | 0.00076 | 2.09403 |
| 121 | C | 10 | dx2y2 | Ryd( 3d) | 0.00055 | 1.49286 | 334 | O | 31 | px    | Val( 2p) | 1.68446 | -0.228  |
| 122 | C | 10 | dz2   | Ryd( 3d) | 0.00112 | 1.44982 | 335 | O | 31 | px    | Ryd( 3p) | 0.00123 | 1.14859 |
|     |   |    |       |          |         |         | 336 | O | 31 | py    | Val( 2p) | 1.57803 | -0.2713 |
| 123 | C | 11 | S     | Cor( 1S) | 1.9988  | -10.109 | 337 | O | 31 | py    | Ryd( 3p) | 0.0007  | 1.06204 |
| 124 | C | 11 | S     | Val( 2S) | 0.81821 | -0.1083 | 338 | O | 31 | pz    | Val( 2p) | 1.68007 | -0.2356 |
| 125 | C | 11 | S     | Ryd( 3S) | 0.00157 | 0.98885 | 339 | O | 31 | pz    | Ryd( 3p) | 0.00093 | 1.14365 |
| 126 | C | 11 | px    | Val( 2p) | 0.995   | -0.0759 | 340 | O | 31 | dxy   | Ryd( 3d) | 0.00133 | 2.9699  |

|     |   |    |       |          |         |         |     |   |    |       |          |         |         |
|-----|---|----|-------|----------|---------|---------|-----|---|----|-------|----------|---------|---------|
| 127 | C | 11 | px    | Ryd( 3p) | 0.00455 | 0.88745 | 341 | O | 31 | dxz   | Ryd( 3d) | 0.00042 | 2.74939 |
| 128 | C | 11 | py    | Val( 2p) | 0.88246 | -0.0452 | 342 | O | 31 | dyz   | Ryd( 3d) | 0.00129 | 3.08724 |
| 129 | C | 11 | py    | Ryd( 3p) | 0.00581 | 0.76111 | 343 | O | 31 | dx2y2 | Ryd( 3d) | 0.00122 | 3.02091 |
| 130 | C | 11 | pz    | Val( 2p) | 0.98807 | -0.0751 | 344 | O | 31 | dz2   | Ryd( 3d) | 0.00083 | 2.84261 |
| 131 | C | 11 | pz    | Ryd( 3p) | 0.00378 | 0.73304 |     |   |    |       |          |         |         |
| 132 | C | 11 | dxy   | Ryd( 3d) | 0.00107 | 1.90179 | 345 | H | 32 | S     | Val( 1S) | 0.76183 | 0.08911 |
| 133 | C | 11 | dxz   | Ryd( 3d) | 0.00083 | 2.05067 | 346 | H | 32 | S     | Ryd( 2S) | 0.00225 | 0.35609 |
| 134 | C | 11 | dyz   | Ryd( 3d) | 0.00086 | 2.00288 | 347 | H | 32 | px    | Ryd( 2p) | 0.00024 | 1.92784 |
| 135 | C | 11 | dx2y2 | Ryd( 3d) | 0.0014  | 1.86977 | 348 | H | 32 | py    | Ryd( 2p) | 0.00019 | 1.68567 |
| 136 | C | 11 | dz2   | Ryd( 3d) | 0.0013  | 1.8084  | 349 | H | 32 | pz    | Ryd( 2p) | 0.00078 | 2.2039  |
|     |   |    |       |          |         |         |     |   |    |       |          |         |         |
| 137 | C | 12 | S     | Cor( 1S) | 1.99905 | -10.127 | 350 | C | 33 | S     | Cor( 1S) | 1.99927 | -10.052 |
| 138 | C | 12 | S     | Val( 2S) | 0.80859 | -0.107  | 351 | C | 33 | S     | Val( 2S) | 1.09594 | -0.2458 |
| 139 | C | 12 | S     | Ryd( 3S) | 0.00536 | 1.00793 | 352 | C | 33 | S     | Ryd( 3S) | 0.00111 | 1.23157 |
| 140 | C | 12 | px    | Val( 2p) | 0.88247 | -0.0386 | 353 | C | 33 | px    | Val( 2p) | 1.16596 | -0.0704 |
| 141 | C | 12 | px    | Ryd( 3p) | 0.00747 | 0.78174 | 354 | C | 33 | px    | Ryd( 3p) | 0.00287 | 0.6071  |
| 142 | C | 12 | py    | Val( 2p) | 0.90805 | -0.0312 | 355 | C | 33 | py    | Val( 2p) | 1.197   | -0.0761 |
| 143 | C | 12 | py    | Ryd( 3p) | 0.0068  | 0.69832 | 356 | C | 33 | py    | Ryd( 3p) | 0.00325 | 0.6284  |
| 144 | C | 12 | pz    | Val( 2p) | 0.78882 | -0.0217 | 357 | C | 33 | pz    | Val( 2p) | 1.17504 | -0.075  |
| 145 | C | 12 | pz    | Ryd( 3p) | 0.01551 | 0.6737  | 358 | C | 33 | pz    | Ryd( 3p) | 0.00298 | 0.61349 |
| 146 | C | 12 | dxy   | Ryd( 3d) | 0.00165 | 1.98706 | 359 | C | 33 | dxy   | Ryd( 3d) | 0.00034 | 1.77222 |
| 147 | C | 12 | dxz   | Ryd( 3d) | 0.00206 | 1.91452 | 360 | C | 33 | dxz   | Ryd( 3d) | 0.00033 | 1.74977 |
| 148 | C | 12 | dyz   | Ryd( 3d) | 0.00176 | 1.97354 | 361 | C | 33 | dyz   | Ryd( 3d) | 0.00019 | 1.71682 |
| 149 | C | 12 | dx2y2 | Ryd( 3d) | 0.00184 | 1.8067  | 362 | C | 33 | dx2y2 | Ryd( 3d) | 0.00061 | 1.96778 |
| 150 | C | 12 | dz2   | Ryd( 3d) | 0.00318 | 1.79372 | 363 | C | 33 | dz2   | Ryd( 3d) | 0.00067 | 1.98149 |
|     |   |    |       |          |         |         |     |   |    |       |          |         |         |
| 151 | C | 13 | S     | Cor( 1S) | 1.9993  | -10.191 | 364 | H | 34 | S     | Val( 1S) | 0.78002 | 0.0648  |
| 152 | C | 13 | S     | Val( 2S) | 0.68872 | -0.0718 | 365 | H | 34 | S     | Ryd( 2S) | 0.00153 | 0.4009  |

|     |   |    |       |          |         |         |     |   |    |     |          |         |         |
|-----|---|----|-------|----------|---------|---------|-----|---|----|-----|----------|---------|---------|
| 153 | C | 13 | S     | Ryd( 3S) | 0.00514 | 0.67377 | 366 | H | 34 | px  | Ryd( 2p) | 0.00018 | 1.71901 |
| 154 | C | 13 | px    | Val( 2p) | 0.8029  | -0.0463 | 367 | H | 34 | py  | Ryd( 2p) | 0.00021 | 1.71498 |
| 155 | C | 13 | px    | Ryd( 3p) | 0.00579 | 0.54941 | 368 | H | 34 | pz  | Ryd( 2p) | 0.00077 | 2.17172 |
| 156 | C | 13 | py    | Val( 2p) | 0.75832 | 0.0036  |     |   |    |     |          |         |         |
| 157 | C | 13 | py    | Ryd( 3p) | 0.01656 | 0.59942 | 369 | H | 35 | S   | Val( 1S) | 0.77274 | 0.07132 |
| 158 | C | 13 | pz    | Val( 2p) | 0.79981 | -0.0214 | 370 | H | 35 | S   | Ryd( 2S) | 0.00142 | 0.40027 |
| 159 | C | 13 | pz    | Ryd( 3p) | 0.0097  | 0.54288 | 371 | H | 35 | px  | Ryd( 2p) | 0.00017 | 1.72079 |
| 160 | C | 13 | dxy   | Ryd( 3d) | 0.00423 | 1.80426 | 372 | H | 35 | py  | Ryd( 2p) | 0.00078 | 2.18228 |
| 161 | C | 13 | dxz   | Ryd( 3d) | 0.00201 | 1.85235 | 373 | H | 35 | pz  | Ryd( 2p) | 0.0002  | 1.7137  |
| 162 | C | 13 | dyz   | Ryd( 3d) | 0.00331 | 1.89795 |     |   |    |     |          |         |         |
| 163 | C | 13 | dx2y2 | Ryd( 3d) | 0.00287 | 1.72381 | 374 | H | 36 | S   | Val( 1S) | 0.76289 | 0.08759 |
| 164 | C | 13 | dz2   | Ryd( 3d) | 0.00382 | 1.68693 | 375 | H | 36 | S   | Ryd( 2S) | 0.00271 | 0.52011 |
|     |   |    |       |          |         |         | 376 | H | 36 | px  | Ryd( 2p) | 0.0007  | 2.16992 |
| 165 | H | 14 | S     | Val( 1S) | 0.57998 | 0.10051 | 377 | H | 36 | py  | Ryd( 2p) | 0.00026 | 1.78057 |
| 166 | H | 14 | S     | Ryd( 2S) | 0.00333 | 0.44529 | 378 | H | 36 | pz  | Ryd( 2p) | 0.0002  | 1.72964 |
| 167 | H | 14 | px    | Ryd( 2p) | 0.00121 | 2.00432 |     |   |    |     |          |         |         |
| 168 | H | 14 | py    | Ryd( 2p) | 0.00069 | 1.96042 | 379 | C | 37 | S   | Cor( 1S) | 1.99927 | -10.057 |
| 169 | H | 14 | pz    | Ryd( 2p) | 0.00057 | 1.79695 | 380 | C | 37 | S   | Val( 2S) | 1.09424 | -0.2501 |
|     |   |    |       |          |         |         | 381 | C | 37 | S   | Ryd( 3S) | 0.00079 | 1.24614 |
| 170 | C | 15 | S     | Cor( 1S) | 1.99907 | -10.071 | 382 | C | 37 | px  | Val( 2p) | 1.10004 | -0.0738 |
| 171 | C | 15 | S     | Val( 2S) | 1.01849 | -0.2342 | 383 | C | 37 | px  | Ryd( 3p) | 0.00251 | 0.52892 |
| 172 | C | 15 | S     | Ryd( 3S) | 0.00165 | 1.46438 | 384 | C | 37 | py  | Val( 2p) | 1.21475 | -0.0827 |
| 173 | C | 15 | px    | Val( 2p) | 1.13357 | -0.0956 | 385 | C | 37 | py  | Ryd( 3p) | 0.00351 | 0.64033 |
| 174 | C | 15 | px    | Ryd( 3p) | 0.00426 | 0.69168 | 386 | C | 37 | pz  | Val( 2p) | 1.21551 | -0.082  |
| 175 | C | 15 | py    | Val( 2p) | 1.09162 | -0.0953 | 387 | C | 37 | pz  | Ryd( 3p) | 0.00359 | 0.64909 |
| 176 | C | 15 | py    | Ryd( 3p) | 0.00392 | 0.59038 | 388 | C | 37 | dxy | Ryd( 3d) | 0.00041 | 1.77471 |
| 177 | C | 15 | pz    | Val( 2p) | 1.20628 | -0.1011 | 389 | C | 37 | dxz | Ryd( 3d) | 0.00048 | 1.82819 |
| 178 | C | 15 | pz    | Ryd( 3p) | 0.00521 | 0.77501 | 390 | C | 37 | dyz | Ryd( 3d) | 0.00012 | 1.73777 |

|     |   |    |       |          |         |         |     |   |    |       |          |         |         |
|-----|---|----|-------|----------|---------|---------|-----|---|----|-------|----------|---------|---------|
| 179 | C | 15 | dxy   | Ryd( 3d) | 0.00079 | 1.91264 | 391 | C | 37 | dx2y2 | Ryd( 3d) | 0.00064 | 1.89143 |
| 180 | C | 15 | dxz   | Ryd( 3d) | 0.00043 | 1.76677 | 392 | C | 37 | dz2   | Ryd( 3d) | 0.00056 | 1.91633 |
| 181 | C | 15 | dyz   | Ryd( 3d) | 0.00063 | 1.73818 |     |   |    |       |          |         |         |
| 182 | C | 15 | dx2y2 | Ryd( 3d) | 0.00062 | 1.80905 | 393 | H | 38 | S     | Val( 1S) | 0.77004 | 0.06778 |
| 183 | C | 15 | dz2   | Ryd( 3d) | 0.00062 | 1.95025 | 394 | H | 38 | S     | Ryd( 2S) | 0.0015  | 0.39353 |
|     |   |    |       |          |         |         | 395 | H | 38 | px    | Ryd( 2p) | 0.00014 | 1.69314 |
| 184 | C | 16 | S     | Cor( 1S) | 1.99909 | -10.05  | 396 | H | 38 | py    | Ryd( 2p) | 0.00081 | 2.18226 |
| 185 | C | 16 | S     | Val( 2S) | 1.04388 | -0.226  | 397 | H | 38 | pz    | Ryd( 2p) | 0.00024 | 1.72627 |
| 186 | C | 16 | S     | Ryd( 3S) | 0.00169 | 1.4219  |     |   |    |       |          |         |         |
| 187 | C | 16 | px    | Val( 2p) | 1.15399 | -0.0832 | 398 | H | 39 | S     | Val( 1S) | 0.77639 | 0.06277 |
| 188 | C | 16 | px    | Ryd( 3p) | 0.00447 | 0.7179  | 399 | H | 39 | S     | Ryd( 2S) | 0.00165 | 0.39365 |
| 189 | C | 16 | py    | Val( 2p) | 1.22419 | -0.0839 | 400 | H | 39 | px    | Ryd( 2p) | 0.00016 | 1.70962 |
| 190 | C | 16 | py    | Ryd( 3p) | 0.0061  | 0.79605 | 401 | H | 39 | py    | Ryd( 2p) | 0.00024 | 1.72588 |
| 191 | C | 16 | pz    | Val( 2p) | 1.07545 | -0.0717 | 402 | H | 39 | pz    | Ryd( 2p) | 0.00078 | 2.15447 |
| 192 | C | 16 | pz    | Ryd( 3p) | 0.0045  | 0.61412 |     |   |    |       |          |         |         |
| 193 | C | 16 | dxy   | Ryd( 3d) | 0.0005  | 1.76117 | 403 | H | 40 | S     | Val( 1S) | 0.77734 | 0.0635  |
| 194 | C | 16 | dxz   | Ryd( 3d) | 0.00065 | 1.94599 | 404 | H | 40 | S     | Ryd( 2S) | 0.00154 | 0.39932 |
| 195 | C | 16 | dyz   | Ryd( 3d) | 0.00057 | 1.75518 | 405 | H | 40 | px    | Ryd( 2p) | 0.00049 | 1.9544  |
| 196 | C | 16 | dx2y2 | Ryd( 3d) | 0.00049 | 1.91253 | 406 | H | 40 | py    | Ryd( 2p) | 0.00031 | 1.79542 |
| 197 | C | 16 | dz2   | Ryd( 3d) | 0.00061 | 1.82812 | 407 | H | 40 | pz    | Ryd( 2p) | 0.00038 | 1.84789 |
|     |   |    |       |          |         |         |     |   |    |       |          |         |         |
| 198 | H | 17 | S     | Val( 1S) | 0.57354 | 0.08451 | 408 | H | 41 | S     | Val( 1S) | 0.74611 | 0.08521 |
| 199 | H | 17 | S     | Ryd( 2S) | 0.00371 | 0.42858 | 409 | H | 41 | S     | Ryd( 2S) | 0.00339 | 0.41097 |
| 200 | H | 17 | px    | Ryd( 2p) | 0.00064 | 1.80212 | 410 | H | 41 | px    | Ryd( 2p) | 0.00019 | 1.80396 |
| 201 | H | 17 | py    | Ryd( 2p) | 0.00056 | 1.86423 | 411 | H | 41 | py    | Ryd( 2p) | 0.00078 | 2.19074 |
| 202 | H | 17 | pz    | Ryd( 2p) | 0.00125 | 2.01146 | 412 | H | 41 | pz    | Ryd( 2p) | 0.00015 | 1.77135 |
|     |   |    |       |          |         |         |     |   |    |       |          |         |         |
| 203 | C | 18 | S     | Cor( 1S) | 1.99903 | -10.073 | 413 | H | 42 | S     | Val( 1S) | 0.74756 | 0.05674 |

|     |   |    |       |          |         |         |  |     |   |    |    |          |         |         |
|-----|---|----|-------|----------|---------|---------|--|-----|---|----|----|----------|---------|---------|
| 204 | C | 18 | S     | Val( 2S) | 0.90364 | -0.2034 |  | 414 | H | 42 | S  | Ryd( 2S) | 0.00246 | 0.40233 |
| 205 | C | 18 | S     | Ryd( 3S) | 0.00032 | 1.54628 |  | 415 | H | 42 | px | Ryd( 2p) | 0.00062 | 2.03079 |
| 206 | C | 18 | px    | Val( 2p) | 1.06045 | -0.0956 |  | 416 | H | 42 | py | Ryd( 2p) | 0.00025 | 1.84512 |
| 207 | C | 18 | px    | Ryd( 3p) | 0.00462 | 0.89495 |  | 417 | H | 42 | pz | Ryd( 2p) | 0.00031 | 1.84162 |
| 208 | C | 18 | py    | Val( 2p) | 1.02318 | -0.0887 |  |     |   |    |    |          |         |         |
| 209 | C | 18 | py    | Ryd( 3p) | 0.00254 | 0.74748 |  | 418 | H | 43 | S  | Val( 1S) | 0.743   | 0.08863 |
| 210 | C | 18 | pz    | Val( 2p) | 1.04834 | -0.0909 |  | 419 | H | 43 | S  | Ryd( 2S) | 0.00413 | 0.41635 |
| 211 | C | 18 | pz    | Ryd( 3p) | 0.00243 | 0.74599 |  | 420 | H | 43 | px | Ryd( 2p) | 0.00019 | 1.8431  |
| 212 | C | 18 | dxy   | Ryd( 3d) | 0.00088 | 1.78777 |  | 421 | H | 43 | py | Ryd( 2p) | 0.00012 | 1.85868 |
| 213 | C | 18 | dxz   | Ryd( 3d) | 0.00098 | 1.7998  |  | 422 | H | 43 | pz | Ryd( 2p) | 0.00085 | 2.23222 |
| 214 | C | 18 | dyz   | Ryd( 3d) | 0.0008  | 1.73237 |  |     |   |    |    |          |         |         |
| 215 | C | 18 | dx2y2 | Ryd( 3d) | 0.00125 | 1.89883 |  |     |   |    |    |          |         |         |
| 216 | C | 18 | dz2   | Ryd( 3d) | 0.00128 | 1.91178 |  |     |   |    |    |          |         |         |
| 4b  |   |    |       |          |         |         |  |     |   |    |    |          |         |         |
| 1   | C | 1  | S     | Cor( 1S) | 1.99859 | -10.123 |  | 217 | H | 19 | S  | Val( 1S) | 0.75786 | 0.04795 |
| 2   | C | 1  | S     | Val( 2S) | 0.82303 | -0.115  |  | 218 | H | 19 | S  | Ryd( 2S) | 0.00258 | 0.41152 |
| 3   | C | 1  | S     | Ryd( 3S) | 0.00192 | 1.034   |  | 219 | H | 19 | px | Ryd( 2p) | 0.0002  | 1.79765 |
| 4   | C | 1  | px    | Val( 2p) | 1.05657 | -0.0744 |  | 220 | H | 19 | py | Ryd( 2p) | 0.00015 | 1.77123 |
| 5   | C | 1  | px    | Ryd( 3p) | 0.00334 | 0.79287 |  | 221 | H | 19 | pz | Ryd( 2p) | 0.0008  | 2.12992 |
| 6   | C | 1  | py    | Val( 2p) | 1.05628 | -0.1071 |  |     |   |    |    |          |         |         |
| 7   | C | 1  | py    | Ryd( 3p) | 0.00182 | 0.64654 |  | 222 | H | 20 | S  | Val( 1S) | 0.75043 | 0.06231 |
| 8   | C | 1  | pz    | Val( 2p) | 0.76881 | -0.026  |  | 223 | H | 20 | S  | Ryd( 2S) | 0.00203 | 0.41336 |
| 9   | C | 1  | pz    | Ryd( 3p) | 0.00917 | 0.77386 |  | 224 | H | 20 | px | Ryd( 2p) | 0.00058 | 2.01071 |
| 10  | C | 1  | dxy   | Ryd( 3d) | 0.00071 | 1.86579 |  | 225 | H | 20 | py | Ryd( 2p) | 0.00028 | 1.81984 |
| 11  | C | 1  | dxz   | Ryd( 3d) | 0.00148 | 1.91078 |  | 226 | H | 20 | pz | Ryd( 2p) | 0.00038 | 1.91171 |
| 12  | C | 1  | dyz   | Ryd( 3d) | 0.00231 | 1.63902 |  |     |   |    |    |          |         |         |
| 13  | C | 1  | dx2y2 | Ryd( 3d) | 0.0008  | 1.64699 |  | 227 | O | 21 | S  | Cor( 1S) | 1.99972 | -18.988 |
| 14  | C | 1  | dz2   | Ryd( 3d) | 0.002   | 2.02422 |  | 228 | O | 21 | S  | Val( 2S) | 1.59314 | -0.887  |



|    |   |   |       |          |         |         |     |   |    |       |          |         |         |
|----|---|---|-------|----------|---------|---------|-----|---|----|-------|----------|---------|---------|
|    |   |   |       |          |         |         | 229 | O | 21 | S     | Ryd( 3S) | 0.00038 | 2.10909 |
| 15 | C | 2 | S     | Cor( 1S) | 1.9985  | -10.118 | 230 | O | 21 | px    | Val( 2p) | 1.61277 | -0.3346 |
| 16 | C | 2 | S     | Val( 2S) | 0.812   | -0.1    | 231 | O | 21 | px    | Ryd( 3p) | 0.00161 | 1.37724 |
| 17 | C | 2 | S     | Ryd( 3S) | 0.00182 | 1.12004 | 232 | O | 21 | py    | Val( 2p) | 1.81701 | -0.3305 |
| 18 | C | 2 | px    | Val( 2p) | 0.96442 | -0.0578 | 233 | O | 21 | py    | Ryd( 3p) | 0.00224 | 1.14439 |
| 19 | C | 2 | px    | Ryd( 3p) | 0.00675 | 0.81767 | 234 | O | 21 | pz    | Val( 2p) | 1.54518 | -0.3378 |
| 20 | C | 2 | py    | Val( 2p) | 0.96208 | -0.0968 | 235 | O | 21 | pz    | Ryd( 3p) | 0.00166 | 1.19948 |
| 21 | C | 2 | py    | Ryd( 3p) | 0.00314 | 0.65452 | 236 | O | 21 | dxy   | Ryd( 3d) | 0.00064 | 2.82525 |
| 22 | C | 2 | pz    | Val( 2p) | 0.90808 | -0.0396 | 237 | O | 21 | dxz   | Ryd( 3d) | 0.00073 | 2.91638 |
| 23 | C | 2 | pz    | Ryd( 3p) | 0.00618 | 0.77204 | 238 | O | 21 | dyz   | Ryd( 3d) | 0.00068 | 2.77271 |
| 24 | C | 2 | dxy   | Ryd( 3d) | 0.00104 | 1.84426 | 239 | O | 21 | dx2y2 | Ryd( 3d) | 0.00062 | 2.77858 |
| 25 | C | 2 | dxz   | Ryd( 3d) | 0.00186 | 1.99113 | 240 | O | 21 | dz2   | Ryd( 3d) | 0.00122 | 3.08349 |
| 26 | C | 2 | dyz   | Ryd( 3d) | 0.00203 | 1.67599 |     |   |    |       |          |         |         |
| 27 | C | 2 | dx2y2 | Ryd( 3d) | 0.00151 | 1.65403 | 241 | O | 22 | S     | Cor( 1S) | 1.99977 | -18.972 |
| 28 | C | 2 | dz2   | Ryd( 3d) | 0.00158 | 2.01073 | 242 | O | 22 | S     | Val( 2S) | 1.658   | -0.9048 |
|    |   |   |       |          |         |         | 243 | O | 22 | S     | Ryd( 3S) | 0.00015 | 2.22339 |
| 29 | C | 3 | S     | Cor( 1S) | 1.99882 | -10.053 | 244 | O | 22 | px    | Val( 2p) | 1.74649 | -0.3302 |
| 30 | C | 3 | S     | Val( 2S) | 0.87639 | -0.1167 | 245 | O | 22 | px    | Ryd( 3p) | 0.00142 | 1.24909 |
| 31 | C | 3 | S     | Ryd( 3S) | 0.00191 | 1.07881 | 246 | O | 22 | py    | Val( 2p) | 1.82253 | -0.3198 |
| 32 | C | 3 | px    | Val( 2p) | 1.05916 | -0.0629 | 247 | O | 22 | py    | Ryd( 3p) | 0.00184 | 1.08543 |
| 33 | C | 3 | px    | Ryd( 3p) | 0.00667 | 0.97912 | 248 | O | 22 | pz    | Val( 2p) | 1.46103 | -0.3061 |
| 34 | C | 3 | py    | Val( 2p) | 1.06355 | -0.0876 | 249 | O | 22 | pz    | Ryd( 3p) | 0.00227 | 1.25187 |
| 35 | C | 3 | py    | Ryd( 3p) | 0.00353 | 0.76345 | 250 | O | 22 | dxy   | Ryd( 3d) | 0.00111 | 2.85341 |
| 36 | C | 3 | pz    | Val( 2p) | 1.08567 | -0.0503 | 251 | O | 22 | dxz   | Ryd( 3d) | 0.00134 | 3.24365 |
| 37 | C | 3 | pz    | Ryd( 3p) | 0.00449 | 0.97815 | 252 | O | 22 | dyz   | Ryd( 3d) | 0.00036 | 2.86231 |
| 38 | C | 3 | dxy   | Ryd( 3d) | 0.0006  | 1.86526 | 253 | O | 22 | dx2y2 | Ryd( 3d) | 0.00121 | 2.82367 |
| 39 | C | 3 | dxz   | Ryd( 3d) | 0.00072 | 1.98183 | 254 | O | 22 | dz2   | Ryd( 3d) | 0.00042 | 3.05468 |
| 40 | C | 3 | dyz   | Ryd( 3d) | 0.00068 | 1.73409 |     |   |    |       |          |         |         |

|    |   |   |       |          |         |         |     |   |    |       |          |         |         |
|----|---|---|-------|----------|---------|---------|-----|---|----|-------|----------|---------|---------|
| 41 | C | 3 | dx2y2 | Ryd( 3d) | 0.00071 | 1.66616 | 255 | H | 23 | S     | Val( 1S) | 0.50103 | 0.09594 |
| 42 | C | 3 | dz2   | Ryd( 3d) | 0.00065 | 2.0778  | 256 | H | 23 | S     | Ryd( 2S) | 0.00294 | 0.4354  |
|    |   |   |       |          |         |         | 257 | H | 23 | px    | Ryd( 2p) | 0.00152 | 1.93448 |
| 43 | C | 4 | S     | Cor( 1S) | 1.99891 | -10.045 | 258 | H | 23 | py    | Ryd( 2p) | 0.00147 | 1.57704 |
| 44 | C | 4 | S     | Val( 2S) | 0.94618 | -0.1326 | 259 | H | 23 | pz    | Ryd( 2p) | 0.00212 | 2.17463 |
| 45 | C | 4 | S     | Ryd( 3S) | 0.00113 | 1.06144 |     |   |    |       |          |         |         |
| 46 | C | 4 | px    | Val( 2p) | 1.06253 | -0.0444 | 260 | C | 24 | S     | Cor( 1S) | 1.99935 | -10.155 |
| 47 | C | 4 | px    | Ryd( 3p) | 0.00343 | 0.71293 | 261 | C | 24 | S     | Val( 2S) | 1.10803 | -0.2873 |
| 48 | C | 4 | py    | Val( 2p) | 1.01973 | -0.0783 | 262 | C | 24 | S     | Ryd( 3S) | 0.00156 | 1.07215 |
| 49 | C | 4 | py    | Ryd( 3p) | 0.00178 | 0.59955 | 263 | C | 24 | px    | Val( 2p) | 0.8347  | -0.0794 |
| 50 | C | 4 | pz    | Val( 2p) | 1.17115 | -0.0486 | 264 | C | 24 | px    | Ryd( 3p) | 0.00256 | 0.47189 |
| 51 | C | 4 | pz    | Ryd( 3p) | 0.00617 | 0.95402 | 265 | C | 24 | py    | Val( 2p) | 1.13013 | -0.0985 |
| 52 | C | 4 | dxy   | Ryd( 3d) | 0.00049 | 1.88803 | 266 | C | 24 | py    | Ryd( 3p) | 0.001   | 0.5098  |
| 53 | C | 4 | dxz   | Ryd( 3d) | 0.00061 | 1.96833 | 267 | C | 24 | pz    | Val( 2p) | 1.16588 | -0.1079 |
| 54 | C | 4 | dyz   | Ryd( 3d) | 0.00051 | 1.64354 | 268 | C | 24 | pz    | Ryd( 3p) | 0.00294 | 0.6839  |
| 55 | C | 4 | dx2y2 | Ryd( 3d) | 0.00063 | 1.68706 | 269 | C | 24 | dxy   | Ryd( 3d) | 0.00148 | 1.70277 |
| 56 | C | 4 | dz2   | Ryd( 3d) | 0.00052 | 2.09238 | 270 | C | 24 | dxz   | Ryd( 3d) | 0.00111 | 1.71599 |
|    |   |   |       |          |         |         | 271 | C | 24 | dyz   | Ryd( 3d) | 0.00053 | 1.64519 |
| 57 | C | 5 | S     | Cor( 1S) | 1.99899 | -10.05  | 272 | C | 24 | dx2y2 | Ryd( 3d) | 0.00162 | 1.78056 |
| 58 | C | 5 | S     | Val( 2S) | 0.95158 | -0.1404 | 273 | C | 24 | dz2   | Ryd( 3d) | 0.001   | 1.89294 |
| 59 | C | 5 | S     | Ryd( 3S) | 0.00096 | 1.0184  |     |   |    |       |          |         |         |
| 60 | C | 5 | px    | Val( 2p) | 1.09192 | -0.049  | 274 | H | 25 | S     | Val( 1S) | 0.80452 | 0.02987 |
| 61 | C | 5 | px    | Ryd( 3p) | 0.00409 | 0.70923 | 275 | H | 25 | S     | Ryd( 2S) | 0.00272 | 0.36229 |
| 62 | C | 5 | py    | Val( 2p) | 1.05962 | -0.0841 | 276 | H | 25 | px    | Ryd( 2p) | 0.00052 | 1.94119 |
| 63 | C | 5 | py    | Ryd( 3p) | 0.00233 | 0.64247 | 277 | H | 25 | py    | Ryd( 2p) | 0.00038 | 1.72877 |
| 64 | C | 5 | pz    | Val( 2p) | 1.11327 | -0.0394 | 278 | H | 25 | pz    | Ryd( 2p) | 0.00035 | 1.74099 |
| 65 | C | 5 | pz    | Ryd( 3p) | 0.00497 | 0.82003 |     |   |    |       |          |         |         |
| 66 | C | 5 | dxy   | Ryd( 3d) | 0.00047 | 1.83118 | 279 | H | 26 | S     | Val( 1S) | 0.7847  | 0.04584 |

|    |   |   |       |          |         |         |
|----|---|---|-------|----------|---------|---------|
| 67 | C | 5 | dxz   | Ryd( 3d) | 0.00061 | 2.06817 |
| 68 | C | 5 | dyz   | Ryd( 3d) | 0.00059 | 1.70444 |
| 69 | C | 5 | dx2y2 | Ryd( 3d) | 0.00054 | 1.63868 |
| 70 | C | 5 | dz2   | Ryd( 3d) | 0.00054 | 1.94865 |
|    |   |   |       |          |         |         |
| 71 | C | 6 | S     | Cor( 1S) | 1.99892 | -10.057 |
| 72 | C | 6 | S     | Val( 2S) | 0.95712 | -0.1511 |
| 73 | C | 6 | S     | Ryd( 3S) | 0.00104 | 1.01646 |
| 74 | C | 6 | px    | Val( 2p) | 1.16139 | -0.073  |
| 75 | C | 6 | px    | Ryd( 3p) | 0.00426 | 0.87267 |
| 76 | C | 6 | py    | Val( 2p) | 1.08585 | -0.0982 |
| 77 | C | 6 | py    | Ryd( 3p) | 0.00216 | 0.64322 |
| 78 | C | 6 | pz    | Val( 2p) | 1.08339 | -0.049  |
| 79 | C | 6 | pz    | Ryd( 3p) | 0.00312 | 0.70123 |
| 80 | C | 6 | dxy   | Ryd( 3d) | 0.00039 | 1.85081 |
| 81 | C | 6 | dxz   | Ryd( 3d) | 0.00068 | 1.92817 |
| 82 | C | 6 | dyz   | Ryd( 3d) | 0.0007  | 1.67099 |
| 83 | C | 6 | dx2y2 | Ryd( 3d) | 0.00054 | 1.65141 |
| 84 | C | 6 | dz2   | Ryd( 3d) | 0.00041 | 2.11559 |
|    |   |   |       |          |         |         |
| 85 | H | 7 | S     | Val( 1S) | 0.76651 | 0.08042 |
| 86 | H | 7 | S     | Ryd( 2S) | 0.0017  | 0.32301 |
| 87 | H | 7 | px    | Ryd( 2p) | 0.00035 | 1.94567 |
| 88 | H | 7 | py    | Ryd( 2p) | 0.00035 | 1.71645 |
| 89 | H | 7 | pz    | Ryd( 2p) | 0.00052 | 2.08355 |
|    |   |   |       |          |         |         |
| 90 | H | 8 | S     | Val( 1S) | 0.76464 | 0.06564 |
| 91 | H | 8 | S     | Ryd( 2S) | 0.00155 | 0.34741 |

|     |   |    |       |          |         |         |
|-----|---|----|-------|----------|---------|---------|
| 280 | H | 26 | S     | Ryd( 2S) | 0.0008  | 0.31004 |
| 281 | H | 26 | px    | Ryd( 2p) | 0.0001  | 1.58596 |
| 282 | H | 26 | py    | Ryd( 2p) | 0.00023 | 1.62243 |
| 283 | H | 26 | pz    | Ryd( 2p) | 0.00087 | 2.15256 |
|     |   |    |       |          |         |         |
| 284 | H | 27 | S     | Val( 1S) | 0.80528 | 0.0294  |
| 285 | H | 27 | S     | Ryd( 2S) | 0.0027  | 0.36275 |
| 286 | H | 27 | px    | Ryd( 2p) | 0.00014 | 1.59583 |
| 287 | H | 27 | py    | Ryd( 2p) | 0.00085 | 2.14139 |
| 288 | H | 27 | pz    | Ryd( 2p) | 0.00025 | 1.67347 |
|     |   |    |       |          |         |         |
| 289 | N | 28 | S     | Cor( 1S) | 1.99907 | -14.212 |
| 290 | N | 28 | S     | Val( 2S) | 1.23964 | -0.5421 |
| 291 | N | 28 | S     | Ryd( 3S) | 0.00146 | 1.71813 |
| 292 | N | 28 | px    | Val( 2p) | 1.48457 | -0.2725 |
| 293 | N | 28 | px    | Ryd( 3p) | 0.00289 | 1.11141 |
| 294 | N | 28 | py    | Val( 2p) | 1.38    | -0.2686 |
| 295 | N | 28 | py    | Ryd( 3p) | 0.00247 | 1.1895  |
| 296 | N | 28 | pz    | Val( 2p) | 1.50458 | -0.2716 |
| 297 | N | 28 | pz    | Ryd( 3p) | 0.00311 | 1.1344  |
| 298 | N | 28 | dxy   | Ryd( 3d) | 0.0006  | 2.38881 |
| 299 | N | 28 | dxz   | Ryd( 3d) | 0.0005  | 2.36202 |
| 300 | N | 28 | dyz   | Ryd( 3d) | 0.0006  | 2.41125 |
| 301 | N | 28 | dx2y2 | Ryd( 3d) | 0.00052 | 2.27001 |
| 302 | N | 28 | dz2   | Ryd( 3d) | 0.00036 | 2.145   |
|     |   |    |       |          |         |         |
| 303 | N | 29 | S     | Cor( 1S) | 1.99918 | -14.201 |
| 304 | N | 29 | S     | Val( 2S) | 1.25725 | -0.5401 |

|     |   |    |       |          |         |         |     |   |    |       |          |         |         |
|-----|---|----|-------|----------|---------|---------|-----|---|----|-------|----------|---------|---------|
| 92  | H | 8  | px    | Ryd( 2p) | 0.00073 | 2.07265 | 305 | N | 29 | S     | Ryd( 3S) | 0.00199 | 1.63674 |
| 93  | H | 8  | py    | Ryd( 2p) | 0.00037 | 1.70892 | 306 | N | 29 | px    | Val( 2p) | 1.52413 | -0.2514 |
| 94  | H | 8  | pz    | Ryd( 2p) | 0.00012 | 1.96773 | 307 | N | 29 | px    | Ryd( 3p) | 0.00417 | 1.12761 |
|     |   |    |       |          |         |         | 308 | N | 29 | py    | Val( 2p) | 1.34121 | -0.2422 |
| 95  | C | 9  | S     | Cor( 1S) | 1.999   | -10.112 | 309 | N | 29 | py    | Ryd( 3p) | 0.00245 | 1.2194  |
| 96  | C | 9  | S     | Val( 2S) | 0.92703 | -0.1895 | 310 | N | 29 | pz    | Val( 2p) | 1.49273 | -0.2606 |
| 97  | C | 9  | S     | Ryd( 3S) | 0.00138 | 1.51295 | 311 | N | 29 | pz    | Ryd( 3p) | 0.00232 | 1.01521 |
| 98  | C | 9  | px    | Val( 2p) | 1.05126 | -0.0849 | 312 | N | 29 | dxy   | Ryd( 3d) | 0.0006  | 2.36773 |
| 99  | C | 9  | px    | Ryd( 3p) | 0.00284 | 0.60679 | 313 | N | 29 | dxz   | Ryd( 3d) | 0.00048 | 2.36367 |
| 100 | C | 9  | py    | Val( 2p) | 0.82715 | -0.0628 | 314 | N | 29 | dyz   | Ryd( 3d) | 0.00052 | 2.34956 |
| 101 | C | 9  | py    | Ryd( 3p) | 0.00662 | 0.66632 | 315 | N | 29 | dx2y2 | Ryd( 3d) | 0.0004  | 2.33122 |
| 102 | C | 9  | pz    | Val( 2p) | 1.20534 | -0.1051 | 316 | N | 29 | dz2   | Ryd( 3d) | 0.00072 | 2.19963 |
| 103 | C | 9  | pz    | Ryd( 3p) | 0.01129 | 0.9467  |     |   |    |       |          |         |         |
| 104 | C | 9  | dxy   | Ryd( 3d) | 0.00108 | 1.89492 | 317 | O | 30 | S     | Cor( 1S) | 1.9998  | -18.852 |
| 105 | C | 9  | dxz   | Ryd( 3d) | 0.00056 | 1.89554 | 318 | O | 30 | S     | Val( 2S) | 1.69253 | -0.8685 |
| 106 | C | 9  | dyz   | Ryd( 3d) | 0.0009  | 1.74443 | 319 | O | 30 | S     | Ryd( 3S) | 0.00045 | 2.10863 |
| 107 | C | 9  | dx2y2 | Ryd( 3d) | 0.0018  | 1.88757 | 320 | O | 30 | px    | Val( 2p) | 1.64559 | -0.246  |
| 108 | C | 9  | dz2   | Ryd( 3d) | 0.00119 | 2.13535 | 321 | O | 30 | px    | Ryd( 3p) | 0.00165 | 1.17735 |
|     |   |    |       |          |         |         | 322 | O | 30 | py    | Val( 2p) | 1.7238  | -0.2495 |
| 109 | C | 10 | S     | Cor( 1S) | 1.99869 | -10.046 | 323 | O | 30 | py    | Ryd( 3p) | 0.00188 | 1.17926 |
| 110 | C | 10 | S     | Val( 2S) | 0.87791 | -0.1166 | 324 | O | 30 | pz    | Val( 2p) | 1.51609 | -0.2655 |
| 111 | C | 10 | S     | Ryd( 3S) | 0.00242 | 1.18498 | 325 | O | 30 | pz    | Ryd( 3p) | 0.00063 | 1.06921 |
| 112 | C | 10 | px    | Val( 2p) | 1.08442 | -0.0762 | 326 | O | 30 | dxy   | Ryd( 3d) | 0.0007  | 2.84381 |
| 113 | C | 10 | px    | Ryd( 3p) | 0.00571 | 0.91928 | 327 | O | 30 | dxz   | Ryd( 3d) | 0.00089 | 3.04624 |
| 114 | C | 10 | py    | Val( 2p) | 1.11711 | -0.0787 | 328 | O | 30 | dyz   | Ryd( 3d) | 0.00094 | 3.0312  |
| 115 | C | 10 | py    | Ryd( 3p) | 0.00461 | 0.96371 | 329 | O | 30 | dx2y2 | Ryd( 3d) | 0.00061 | 2.83003 |
| 116 | C | 10 | pz    | Val( 2p) | 1.10918 | -0.0833 | 330 | O | 30 | dz2   | Ryd( 3d) | 0.00152 | 2.93035 |
| 117 | C | 10 | pz    | Ryd( 3p) | 0.00396 | 0.84746 |     |   |    |       |          |         |         |

|     |   |    |       |          |         |         |     |   |    |       |          |         |         |
|-----|---|----|-------|----------|---------|---------|-----|---|----|-------|----------|---------|---------|
| 118 | C | 10 | dxy   | Ryd( 3d) | 0.00118 | 1.60508 | 331 | H | 31 | S     | Val( 1S) | 0.76204 | 0.08425 |
| 119 | C | 10 | dxz   | Ryd( 3d) | 0.00097 | 1.68512 | 332 | H | 31 | S     | Ryd( 2S) | 0.00221 | 0.35079 |
| 120 | C | 10 | dyz   | Ryd( 3d) | 0.00079 | 1.6636  | 333 | H | 31 | px    | Ryd( 2p) | 0.00023 | 1.92716 |
| 121 | C | 10 | dx2y2 | Ryd( 3d) | 0.00057 | 1.52531 | 334 | H | 31 | py    | Ryd( 2p) | 0.0002  | 1.6774  |
| 122 | C | 10 | dz2   | Ryd( 3d) | 0.00123 | 1.4181  | 335 | H | 31 | pz    | Ryd( 2p) | 0.00079 | 2.19739 |
|     |   |    |       |          |         |         |     |   |    |       |          |         |         |
| 123 | C | 11 | S     | Cor( 1S) | 1.99879 | -10.115 | 336 | C | 32 | S     | Cor( 1S) | 1.99927 | -10.055 |
| 124 | C | 11 | S     | Val( 2S) | 0.81829 | -0.115  | 337 | C | 32 | S     | Val( 2S) | 1.09597 | -0.2491 |
| 125 | C | 11 | S     | Ryd( 3S) | 0.00159 | 0.98739 | 338 | C | 32 | S     | Ryd( 3S) | 0.00111 | 1.22889 |
| 126 | C | 11 | px    | Val( 2p) | 1.00085 | -0.0831 | 339 | C | 32 | px    | Val( 2p) | 1.1655  | -0.0736 |
| 127 | C | 11 | px    | Ryd( 3p) | 0.00479 | 0.88882 | 340 | C | 32 | px    | Ryd( 3p) | 0.00288 | 0.6046  |
| 128 | C | 11 | py    | Val( 2p) | 0.87711 | -0.0417 | 341 | C | 32 | py    | Val( 2p) | 1.20766 | -0.08   |
| 129 | C | 11 | py    | Ryd( 3p) | 0.00594 | 0.76977 | 342 | C | 32 | py    | Ryd( 3p) | 0.00332 | 0.63661 |
| 130 | C | 11 | pz    | Val( 2p) | 0.99178 | -0.0898 | 343 | C | 32 | pz    | Val( 2p) | 1.16518 | -0.0778 |
| 131 | C | 11 | pz    | Ryd( 3p) | 0.004   | 0.73213 | 344 | C | 32 | pz    | Ryd( 3p) | 0.00294 | 0.59906 |
| 132 | C | 11 | dxy   | Ryd( 3d) | 0.00112 | 1.89004 | 345 | C | 32 | dxy   | Ryd( 3d) | 0.00029 | 1.75624 |
| 133 | C | 11 | dxz   | Ryd( 3d) | 0.00074 | 2.05112 | 346 | C | 32 | dxz   | Ryd( 3d) | 0.00039 | 1.76338 |
| 134 | C | 11 | dyz   | Ryd( 3d) | 0.00088 | 1.95108 | 347 | C | 32 | dyz   | Ryd( 3d) | 0.00021 | 1.71528 |
| 135 | C | 11 | dx2y2 | Ryd( 3d) | 0.00141 | 1.93035 | 348 | C | 32 | dx2y2 | Ryd( 3d) | 0.00062 | 1.97787 |
| 136 | C | 11 | dz2   | Ryd( 3d) | 0.00125 | 1.77891 | 349 | C | 32 | dz2   | Ryd( 3d) | 0.00064 | 1.95957 |
|     |   |    |       |          |         |         |     |   |    |       |          |         |         |
| 137 | C | 12 | S     | Cor( 1S) | 1.99906 | -10.133 | 350 | H | 33 | S     | Val( 1S) | 0.77896 | 0.06236 |
| 138 | C | 12 | S     | Val( 2S) | 0.80889 | -0.1137 | 351 | H | 33 | S     | Ryd( 2S) | 0.00151 | 0.39857 |
| 139 | C | 12 | S     | Ryd( 3S) | 0.0054  | 1.00135 | 352 | H | 33 | px    | Ryd( 2p) | 0.00018 | 1.71839 |
| 140 | C | 12 | px    | Val( 2p) | 0.87939 | -0.0449 | 353 | H | 33 | py    | Ryd( 2p) | 0.00023 | 1.73273 |
| 141 | C | 12 | px    | Ryd( 3p) | 0.00761 | 0.77327 | 354 | H | 33 | pz    | Ryd( 2p) | 0.00074 | 2.14716 |
| 142 | C | 12 | py    | Val( 2p) | 0.91004 | -0.0282 |     |   |    |       |          |         |         |
| 143 | C | 12 | py    | Ryd( 3p) | 0.00822 | 0.69258 | 355 | H | 34 | S     | Val( 1S) | 0.77229 | 0.06845 |

|     |   |    |       |          |         |         |     |   |    |       |          |         |         |
|-----|---|----|-------|----------|---------|---------|-----|---|----|-------|----------|---------|---------|
| 144 | C | 12 | pz    | Val( 2p) | 0.78855 | -0.0372 | 356 | H | 34 | S     | Ryd( 2S) | 0.00141 | 0.3973  |
| 145 | C | 12 | pz    | Ryd( 3p) | 0.01389 | 0.66884 | 357 | H | 34 | px    | Ryd( 2p) | 0.00017 | 1.71813 |
| 146 | C | 12 | dxy   | Ryd( 3d) | 0.00175 | 1.98516 | 358 | H | 34 | py    | Ryd( 2p) | 0.0008  | 2.19398 |
| 147 | C | 12 | dxz   | Ryd( 3d) | 0.00196 | 1.90781 | 359 | H | 34 | pz    | Ryd( 2p) | 0.00018 | 1.69536 |
| 148 | C | 12 | dyz   | Ryd( 3d) | 0.00168 | 1.9657  |     |   |    |       |          |         |         |
| 149 | C | 12 | dx2y2 | Ryd( 3d) | 0.00203 | 1.84397 | 360 | H | 35 | S     | Val( 1S) | 0.76309 | 0.08431 |
| 150 | C | 12 | dz2   | Ryd( 3d) | 0.0031  | 1.73911 | 361 | H | 35 | S     | Ryd( 2S) | 0.00278 | 0.51886 |
|     |   |    |       |          |         |         | 362 | H | 35 | px    | Ryd( 2p) | 0.0007  | 2.16583 |
| 151 | C | 13 | S     | Cor( 1S) | 1.99921 | -10.183 | 363 | H | 35 | py    | Ryd( 2p) | 0.00027 | 1.77845 |
| 152 | C | 13 | S     | Val( 2S) | 0.87192 | -0.2103 | 364 | H | 35 | pz    | Ryd( 2p) | 0.0002  | 1.72733 |
| 153 | C | 13 | S     | Ryd( 3S) | 0.00207 | 0.73691 |     |   |    |       |          |         |         |
| 154 | C | 13 | px    | Val( 2p) | 0.86702 | -0.0932 | 365 | C | 36 | S     | Cor( 1S) | 1.99927 | -10.06  |
| 155 | C | 13 | px    | Ryd( 3p) | 0.00899 | 0.5612  | 366 | C | 36 | S     | Val( 2S) | 1.09427 | -0.2532 |
| 156 | C | 13 | py    | Val( 2p) | 1.02641 | -0.1501 | 367 | C | 36 | S     | Ryd( 3S) | 0.00078 | 1.24372 |
| 157 | C | 13 | py    | Ryd( 3p) | 0.00867 | 0.80314 | 368 | C | 36 | px    | Val( 2p) | 1.09973 | -0.0767 |
| 158 | C | 13 | pz    | Val( 2p) | 0.87435 | -0.0883 | 369 | C | 36 | px    | Ryd( 3p) | 0.00252 | 0.52694 |
| 159 | C | 13 | pz    | Ryd( 3p) | 0.01093 | 0.55928 | 370 | C | 36 | py    | Val( 2p) | 1.21705 | -0.086  |
| 160 | C | 13 | dxy   | Ryd( 3d) | 0.00314 | 1.63564 | 371 | C | 36 | py    | Ryd( 3p) | 0.00352 | 0.64012 |
| 161 | C | 13 | dxz   | Ryd( 3d) | 0.00126 | 1.83548 | 372 | C | 36 | pz    | Val( 2p) | 1.21367 | -0.0848 |
| 162 | C | 13 | dyz   | Ryd( 3d) | 0.00285 | 1.69375 | 373 | C | 36 | pz    | Ryd( 3p) | 0.00358 | 0.6432  |
| 163 | C | 13 | dx2y2 | Ryd( 3d) | 0.00231 | 1.6855  | 374 | C | 36 | dxy   | Ryd( 3d) | 0.00035 | 1.74711 |
| 164 | C | 13 | dz2   | Ryd( 3d) | 0.00268 | 1.58792 | 375 | C | 36 | dxz   | Ryd( 3d) | 0.00054 | 1.85159 |
|     |   |    |       |          |         |         | 376 | C | 36 | dyz   | Ryd( 3d) | 0.00015 | 1.74505 |
| 165 | H | 14 | S     | Val( 1S) | 0.56854 | 0.09597 | 377 | C | 36 | dx2y2 | Ryd( 3d) | 0.00066 | 1.90188 |
| 166 | H | 14 | S     | Ryd( 2S) | 0.00391 | 0.42783 | 378 | C | 36 | dz2   | Ryd( 3d) | 0.0005  | 1.8877  |
| 167 | H | 14 | px    | Ryd( 2p) | 0.00112 | 1.96158 |     |   |    |       |          |         |         |
| 168 | H | 14 | py    | Ryd( 2p) | 0.0007  | 1.98502 | 379 | H | 37 | S     | Val( 1S) | 0.76953 | 0.06518 |
| 169 | H | 14 | pz    | Ryd( 2p) | 0.00064 | 1.80198 | 380 | H | 37 | S     | Ryd( 2S) | 0.00149 | 0.39108 |

|     |   |    |       |          |         |         |     |   |    |    |          |         |         |
|-----|---|----|-------|----------|---------|---------|-----|---|----|----|----------|---------|---------|
|     |   |    |       |          |         |         | 381 | H | 37 | px | Ryd( 2p) | 0.00014 | 1.68981 |
| 170 | C | 15 | S     | Cor( 1S) | 1.99908 | -10.076 | 382 | H | 37 | py | Ryd( 2p) | 0.00082 | 2.18873 |
| 171 | C | 15 | S     | Val( 2S) | 1.01857 | -0.2387 | 383 | H | 37 | pz | Ryd( 2p) | 0.00023 | 1.71527 |
| 172 | C | 15 | S     | Ryd( 3S) | 0.00165 | 1.46218 |     |   |    |    |          |         |         |
| 173 | C | 15 | px    | Val( 2p) | 1.13234 | -0.0999 | 384 | H | 38 | S  | Val( 1S) | 0.77543 | 0.06062 |
| 174 | C | 15 | px    | Ryd( 3p) | 0.00424 | 0.6838  | 385 | H | 38 | S  | Ryd( 2S) | 0.00162 | 0.39121 |
| 175 | C | 15 | py    | Val( 2p) | 1.09538 | -0.1004 | 386 | H | 38 | px | Ryd( 2p) | 0.00017 | 1.70971 |
| 176 | C | 15 | py    | Ryd( 3p) | 0.0042  | 0.5837  | 387 | H | 38 | py | Ryd( 2p) | 0.00026 | 1.74616 |
| 177 | C | 15 | pz    | Val( 2p) | 1.20387 | -0.1051 | 388 | H | 38 | pz | Ryd( 2p) | 0.00075 | 2.12664 |
| 178 | C | 15 | pz    | Ryd( 3p) | 0.00499 | 0.77707 |     |   |    |    |          |         |         |
| 179 | C | 15 | dxy   | Ryd( 3d) | 0.0007  | 1.87788 | 389 | H | 39 | S  | Val( 1S) | 0.77686 | 0.06094 |
| 180 | C | 15 | dxz   | Ryd( 3d) | 0.00051 | 1.79216 | 390 | H | 39 | S  | Ryd( 2S) | 0.00152 | 0.39679 |
| 181 | C | 15 | dyz   | Ryd( 3d) | 0.00071 | 1.76966 | 391 | H | 39 | px | Ryd( 2p) | 0.00049 | 1.95214 |
| 182 | C | 15 | dx2y2 | Ryd( 3d) | 0.00064 | 1.8249  | 392 | H | 39 | py | Ryd( 2p) | 0.00028 | 1.76833 |
| 183 | C | 15 | dz2   | Ryd( 3d) | 0.00052 | 1.88913 | 393 | H | 39 | pz | Ryd( 2p) | 0.00041 | 1.86899 |
|     |   |    |       |          |         |         |     |   |    |    |          |         |         |
| 184 | C | 16 | S     | Cor( 1S) | 1.99909 | -10.055 | 394 | H | 40 | S  | Val( 1S) | 0.74485 | 0.08132 |
| 185 | C | 16 | S     | Val( 2S) | 1.04408 | -0.2309 | 395 | H | 40 | S  | Ryd( 2S) | 0.0033  | 0.40695 |
| 186 | C | 16 | S     | Ryd( 3S) | 0.00169 | 1.41763 | 396 | H | 40 | px | Ryd( 2p) | 0.00019 | 1.80006 |
| 187 | C | 16 | px    | Val( 2p) | 1.15354 | -0.0879 | 397 | H | 40 | py | Ryd( 2p) | 0.00081 | 2.20258 |
| 188 | C | 16 | px    | Ryd( 3p) | 0.00448 | 0.71702 | 398 | H | 40 | pz | Ryd( 2p) | 0.00012 | 1.75101 |
| 189 | C | 16 | py    | Val( 2p) | 1.22142 | -0.0879 |     |   |    |    |          |         |         |
| 190 | C | 16 | py    | Ryd( 3p) | 0.00638 | 0.77857 | 399 | H | 41 | S  | Val( 1S) | 0.74616 | 0.05358 |
| 191 | C | 16 | pz    | Val( 2p) | 1.07951 | -0.0773 | 400 | H | 41 | S  | Ryd( 2S) | 0.00242 | 0.39925 |
| 192 | C | 16 | pz    | Ryd( 3p) | 0.00417 | 0.61931 | 401 | H | 41 | px | Ryd( 2p) | 0.00062 | 2.02758 |
| 193 | C | 16 | dxy   | Ryd( 3d) | 0.00044 | 1.73423 | 402 | H | 41 | py | Ryd( 2p) | 0.00022 | 1.82454 |
| 194 | C | 16 | dxz   | Ryd( 3d) | 0.00072 | 1.96643 | 403 | H | 41 | pz | Ryd( 2p) | 0.00034 | 1.85336 |
| 195 | C | 16 | dyz   | Ryd( 3d) | 0.00054 | 1.72676 |     |   |    |    |          |         |         |

|     |   |    |       |          |         |         |     |   |    |       |          |         |         |
|-----|---|----|-------|----------|---------|---------|-----|---|----|-------|----------|---------|---------|
| 196 | C | 16 | dx2y2 | Ryd( 3d) | 0.00055 | 1.93655 | 404 | H | 42 | S     | Val( 1S) | 0.74018 | 0.08065 |
| 197 | C | 16 | dz2   | Ryd( 3d) | 0.00058 | 1.81577 | 405 | H | 42 | S     | Ryd( 2S) | 0.00407 | 0.40759 |
|     |   |    |       |          |         |         | 406 | H | 42 | px    | Ryd( 2p) | 0.00018 | 1.83624 |
| 198 | H | 17 | S     | Val( 1S) | 0.56281 | 0.08295 | 407 | H | 42 | py    | Ryd( 2p) | 0.00012 | 1.85846 |
| 199 | H | 17 | S     | Ryd( 2S) | 0.00444 | 0.42389 | 408 | H | 42 | pz    | Ryd( 2p) | 0.00085 | 2.21386 |
| 200 | H | 17 | px    | Ryd( 2p) | 0.00066 | 1.81072 |     |   |    |       |          |         |         |
| 201 | H | 17 | py    | Ryd( 2p) | 0.00067 | 1.9201  | 409 | S | 43 | S     | Cor( 1S) | 2       | -87.596 |
| 202 | H | 17 | pz    | Ryd( 2p) | 0.00113 | 1.94328 | 410 | S | 43 | S     | Cor( 2S) | 1.99944 | -8.8124 |
|     |   |    |       |          |         |         | 411 | S | 43 | S     | Val( 3S) | 1.76575 | -0.7171 |
| 203 | C | 18 | S     | Cor( 1S) | 1.99903 | -10.077 | 412 | S | 43 | S     | Ryd( 4S) | 0.00815 | 0.76895 |
| 204 | C | 18 | S     | Val( 2S) | 0.90394 | -0.2076 | 413 | S | 43 | px    | Cor( 2p) | 1.99995 | -5.8305 |
| 205 | C | 18 | S     | Ryd( 3S) | 0.00032 | 1.54309 | 414 | S | 43 | px    | Val( 3p) | 1.70129 | -0.1794 |
| 206 | C | 18 | px    | Val( 2p) | 1.06161 | -0.0997 | 415 | S | 43 | px    | Ryd( 4p) | 0.00189 | 0.56415 |
| 207 | C | 18 | px    | Ryd( 3p) | 0.00462 | 0.89097 | 416 | S | 43 | py    | Cor( 2p) | 1.99983 | -5.835  |
| 208 | C | 18 | py    | Val( 2p) | 1.02073 | -0.0921 | 417 | S | 43 | py    | Val( 3p) | 1.08545 | -0.1288 |
| 209 | C | 18 | py    | Ryd( 3p) | 0.00251 | 0.73652 | 418 | S | 43 | py    | Ryd( 4p) | 0.00528 | 0.51018 |
| 210 | C | 18 | pz    | Val( 2p) | 1.04918 | -0.0954 | 419 | S | 43 | pz    | Cor( 2p) | 1.99994 | -5.831  |
| 211 | C | 18 | pz    | Ryd( 3p) | 0.00247 | 0.75087 | 420 | S | 43 | pz    | Val( 3p) | 1.65285 | -0.1763 |
| 212 | C | 18 | dxy   | Ryd( 3d) | 0.00082 | 1.75866 | 421 | S | 43 | pz    | Ryd( 4p) | 0.00189 | 0.55959 |
| 213 | C | 18 | dxz   | Ryd( 3d) | 0.00104 | 1.82403 | 422 | S | 43 | dxy   | Ryd( 3d) | 0.00249 | 0.96106 |
| 214 | C | 18 | dyz   | Ryd( 3d) | 0.00082 | 1.73521 | 423 | S | 43 | dxz   | Ryd( 3d) | 0.00052 | 0.73183 |
| 215 | C | 18 | dx2y2 | Ryd( 3d) | 0.00127 | 1.91121 | 424 | S | 43 | dyz   | Ryd( 3d) | 0.00292 | 0.99554 |
| 216 | C | 18 | dz2   | Ryd( 3d) | 0.00124 | 1.88137 | 425 | S | 43 | dx2y2 | Ryd( 3d) | 0.00389 | 0.97677 |
|     |   |    |       |          |         |         | 426 | S | 43 | dz2   | Ryd( 3d) | 0.00143 | 0.81077 |



**Table S4.** Non-bond interactions of molecules (4a and 4b) with proteins (PDB IDs: 1DB4 and 2PWB).

| Distance (Å)               | Category      | Type                       | From          | From Chemistry | To          | To Chemistry |
|----------------------------|---------------|----------------------------|---------------|----------------|-------------|--------------|
| <b>Favourable Non-bond</b> |               |                            |               |                |             |              |
| <b>1DB4 vs 4a</b>          |               |                            |               |                |             |              |
| 2.27                       | Hydrogen Bond | Conventional Hydrogen Bond | A:SER113:HG   | H-Donor        | :UNK0:O     | H-Acceptor   |
| 2.63                       | Hydrogen Bond | Conventional Hydrogen Bond | A:ASN114:HD22 | H-Donor        | :UNK0:O     | H-Acceptor   |
| 2.34                       | Hydrogen Bond | Conventional Hydrogen Bond | A:LYS115:HN   | H-Donor        | :UNK0:O     | H-Acceptor   |
| 2.99                       | Hydrogen Bond | Conventional Hydrogen Bond | :UNK0:H       | H-Donor        | A:CYS28:O   | H-Acceptor   |
| 3.52                       | Hydrophobic   | Pi-Sigma                   | A:ASN114:CB   | C-H            | :UNK0       | Pi-Orbitals  |
| 4.33                       | Hydrophobic   | Alkyl                      | :UNK0:C       | Alkyl          | A:VAL30     | Alkyl        |
| 3.90                       | Hydrophobic   | Alkyl                      | :UNK0:C       | Alkyl          | A:VAL30     | Alkyl        |
| <b>1DB4 vs 4b</b>          |               |                            |               |                |             |              |
| 2.47                       | Hydrogen Bond | Conventional Hydrogen Bond | A:GLY29:HN    | H-Donor        | :UNK0:O     | H-Acceptor   |
| 2.55                       | Hydrogen Bond | Conventional Hydrogen Bond | A:VAL30:HN    | H-Donor        | :UNK0:O     | H-Acceptor   |
| 2.28                       | Hydrogen Bond | Conventional Hydrogen Bond | A:HIS47:HD1   | H-Donor        | :UNK0:O     | H-Acceptor   |
| 3.70                       | Hydrogen Bond | Carbon Hydrogen Bond       | :UNK0:C       | H-Donor        | A:HIS27:O   | H-Acceptor   |
| 3.33                       | Hydrogen Bond | Carbon Hydrogen Bond       | :UNK0:C       | H-Donor        | A:ASP48:OD2 | H-Acceptor   |
| 5.09                       | Other         | Pi-Sulfur                  | :UNK0:S       | Sulfur         | A:HIS6      | Pi-Orbitals  |
| 5.23                       | Hydrophobic   | Pi-Pi T-shaped             | A:PHE5        | Pi-Orbitals    | :UNK0       | Pi-Orbitals  |
| 4.92                       | Hydrophobic   | Alkyl                      | :UNK0:C       | Alkyl          | A:LEU2      | Alkyl        |
| <b>2PWB vs 4a</b>          |               |                            |               |                |             |              |
| 2.07                       | Hydrogen Bond | Conventional Hydrogen Bond | A:TRP8:HN     | H-Donor        | :UNK0:O     | H-Acceptor   |
| 2.41                       | Hydrogen Bond | Conventional Hydrogen Bond | A:ARG185:HH22 | H-Donor        | :UNK0:O     | H-Acceptor   |
| 2.96                       | Hydrogen Bond | Conventional Hydrogen Bond | :UNK0:H       | H-Donor        | A:ASN5:O    | H-Acceptor   |
| 2.61                       | Hydrogen Bond | Conventional Hydrogen Bond | :UNK0:H       | H-Donor        | A:ALA6:O    | H-Acceptor   |

|                                              |                             |                                  |               |                  |            |                         |
|----------------------------------------------|-----------------------------|----------------------------------|---------------|------------------|------------|-------------------------|
| 1.86                                         | Hydrogen Bond               | Conventional Hydrogen Bond       | :UNK0:H       | H-Donor          | A:ALA6:O   | H-Acceptor              |
| 3.18                                         | Hydrogen Bond               | Carbon Hydrogen Bond             | A:TRP8:CD1    | H-Donor          | :UNK0:O    | H-Acceptor              |
| 3.92                                         | Hydrogen Bond;Electrostatic | Pi-Cation;Pi-Donor Hydrogen Bond | A:ARG185:N H1 | Positive;H-Donor | :UNK0      | Pi-Orbitals;Pi-Orbitals |
| 4.69                                         | Hydrophobic                 | Alkyl                            | :UNK0:C       | Alkyl            | A:LEU209   | Alkyl                   |
| 2PWB vs 4b                                   |                             |                                  |               |                  |            |                         |
| 2.23                                         | Hydrogen Bond               | Conventional Hydrogen Bond       | A:VAL127:HN   | H-Donor          | :UNK0:O    | H-Acceptor              |
| 2.05                                         | Hydrogen Bond               | Conventional Hydrogen Bond       | A:ALA245:HN   | H-Donor          | :UNK0:O    | H-Acceptor              |
| 2.95                                         | Hydrogen Bond               | Conventional Hydrogen Bond       | :UNK0:H       | H-Donor          | A:GLY152:O | H-Acceptor              |
| 2.52                                         | Hydrogen Bond               | Conventional Hydrogen Bond       | :UNK0:H       | H-Donor          | A:GLY152:O | H-Acceptor              |
| 2.73                                         | Hydrogen Bond               | Conventional Hydrogen Bond       | :UNK0:H       | H-Donor          | :UNK0:O    | H-Acceptor              |
| 3.41                                         | Hydrogen Bond               | Carbon Hydrogen Bond             | A:GLY126:CA   | H-Donor          | :UNK0:O    | H-Acceptor              |
| 3.41                                         | Hydrogen Bond               | Carbon Hydrogen Bond             | A:GLY126:CA   | H-Donor          | :UNK0:O    | H-Acceptor              |
| 3.26                                         | Hydrogen Bond               | Carbon Hydrogen Bond             | :UNK0:C       | H-Donor          | A:LYS125:O | H-Acceptor              |
| 4.63                                         | Hydrophobic                 | Pi-Alkyl                         | :UNK0         | Pi-Orbitals      | A:ALA245   | Alkyl                   |
| Unsatisfied Bond (within compounds 4a and4b) |                             |                                  |               |                  |            |                         |
| Name                                         | Atom                        | Unsatisfied type                 |               | Name             | Atom       | Unsatisfied type        |
| 1DB4 vs 4a                                   |                             |                                  |               |                  |            |                         |
| :UNK0:H                                      | H                           | Donor                            |               | :UNK0:H          | H          | Donor                   |
| :UNK0:O                                      | O                           | Acceptor                         |               |                  |            |                         |
| 1DB4 vs 4b                                   |                             |                                  |               |                  |            |                         |
| :UNK0:H                                      | H                           | Donor                            |               | :UNK0:H          | H          | Donor                   |
| :UNK0:H                                      | H                           | Donor                            |               |                  |            |                         |
| 2PWB vs 4a                                   |                             |                                  |               |                  |            |                         |
| :UNK0:H                                      | H                           | Donor                            |               | :UNK0:O          | O          | Acceptor                |
| :UNK0:O                                      | O                           | Acceptor                         |               |                  |            |                         |
| 2PWB vs 4b                                   |                             |                                  |               |                  |            |                         |

|         |   |       |  |         |   |       |
|---------|---|-------|--|---------|---|-------|
| :UNK0:H | H | Donor |  | :UNK0:S | S | Donor |
|---------|---|-------|--|---------|---|-------|

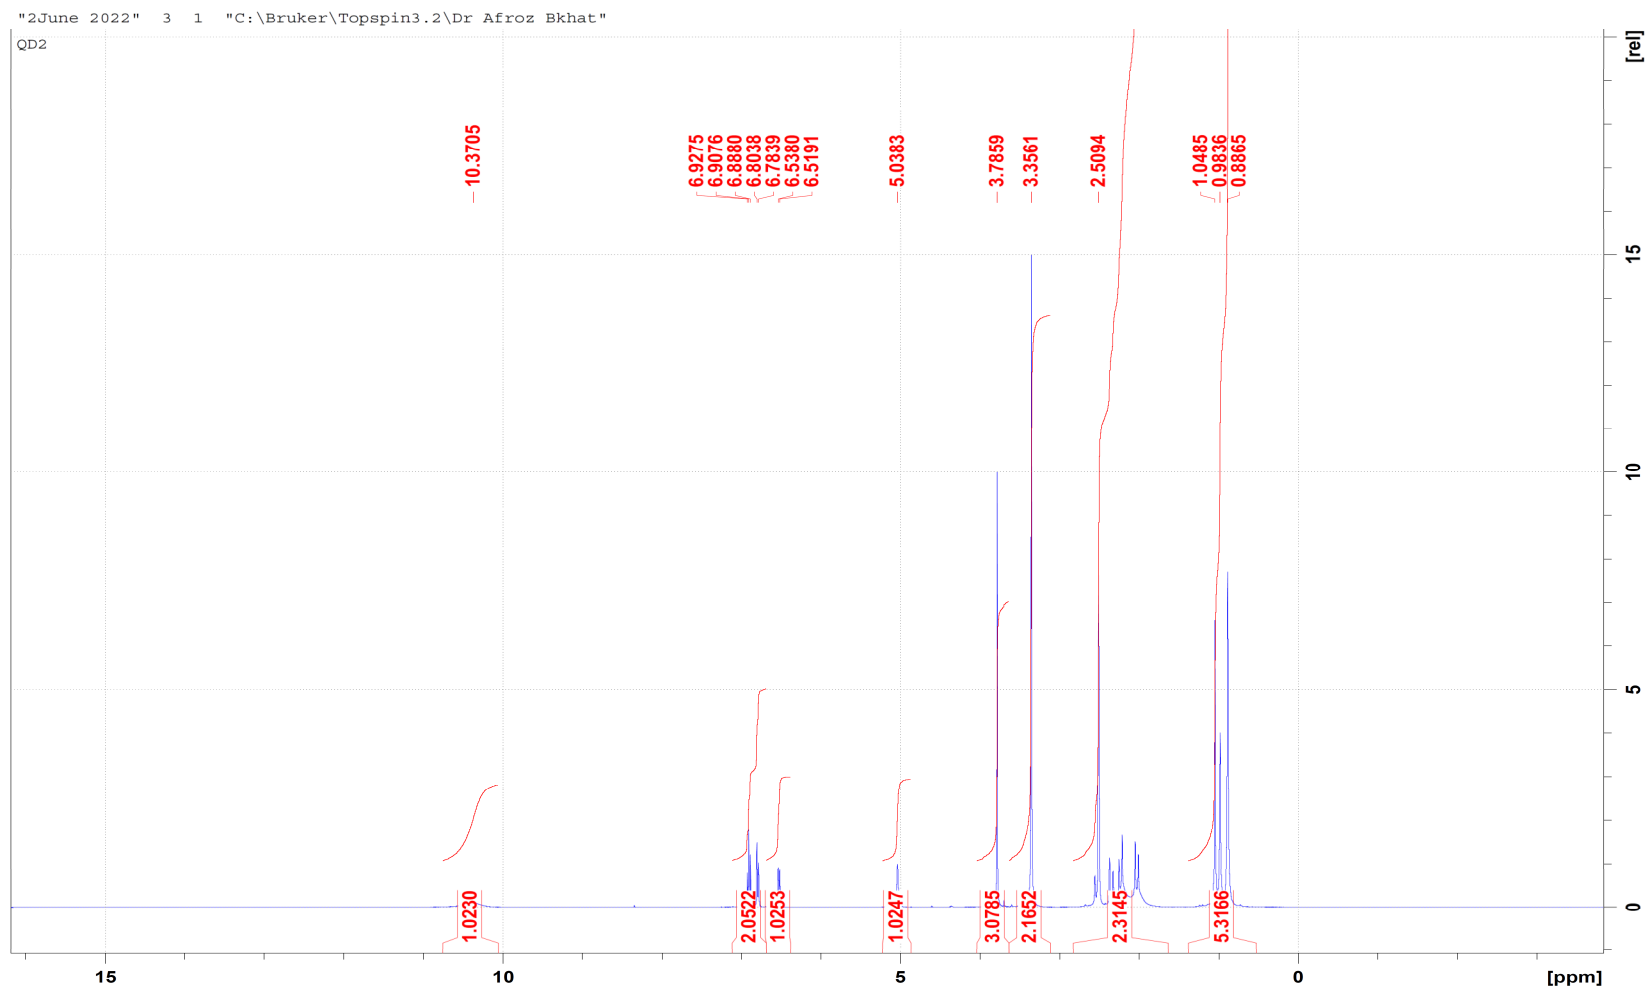

Figure S1. <sup>1</sup>H NMR of compound 4a.

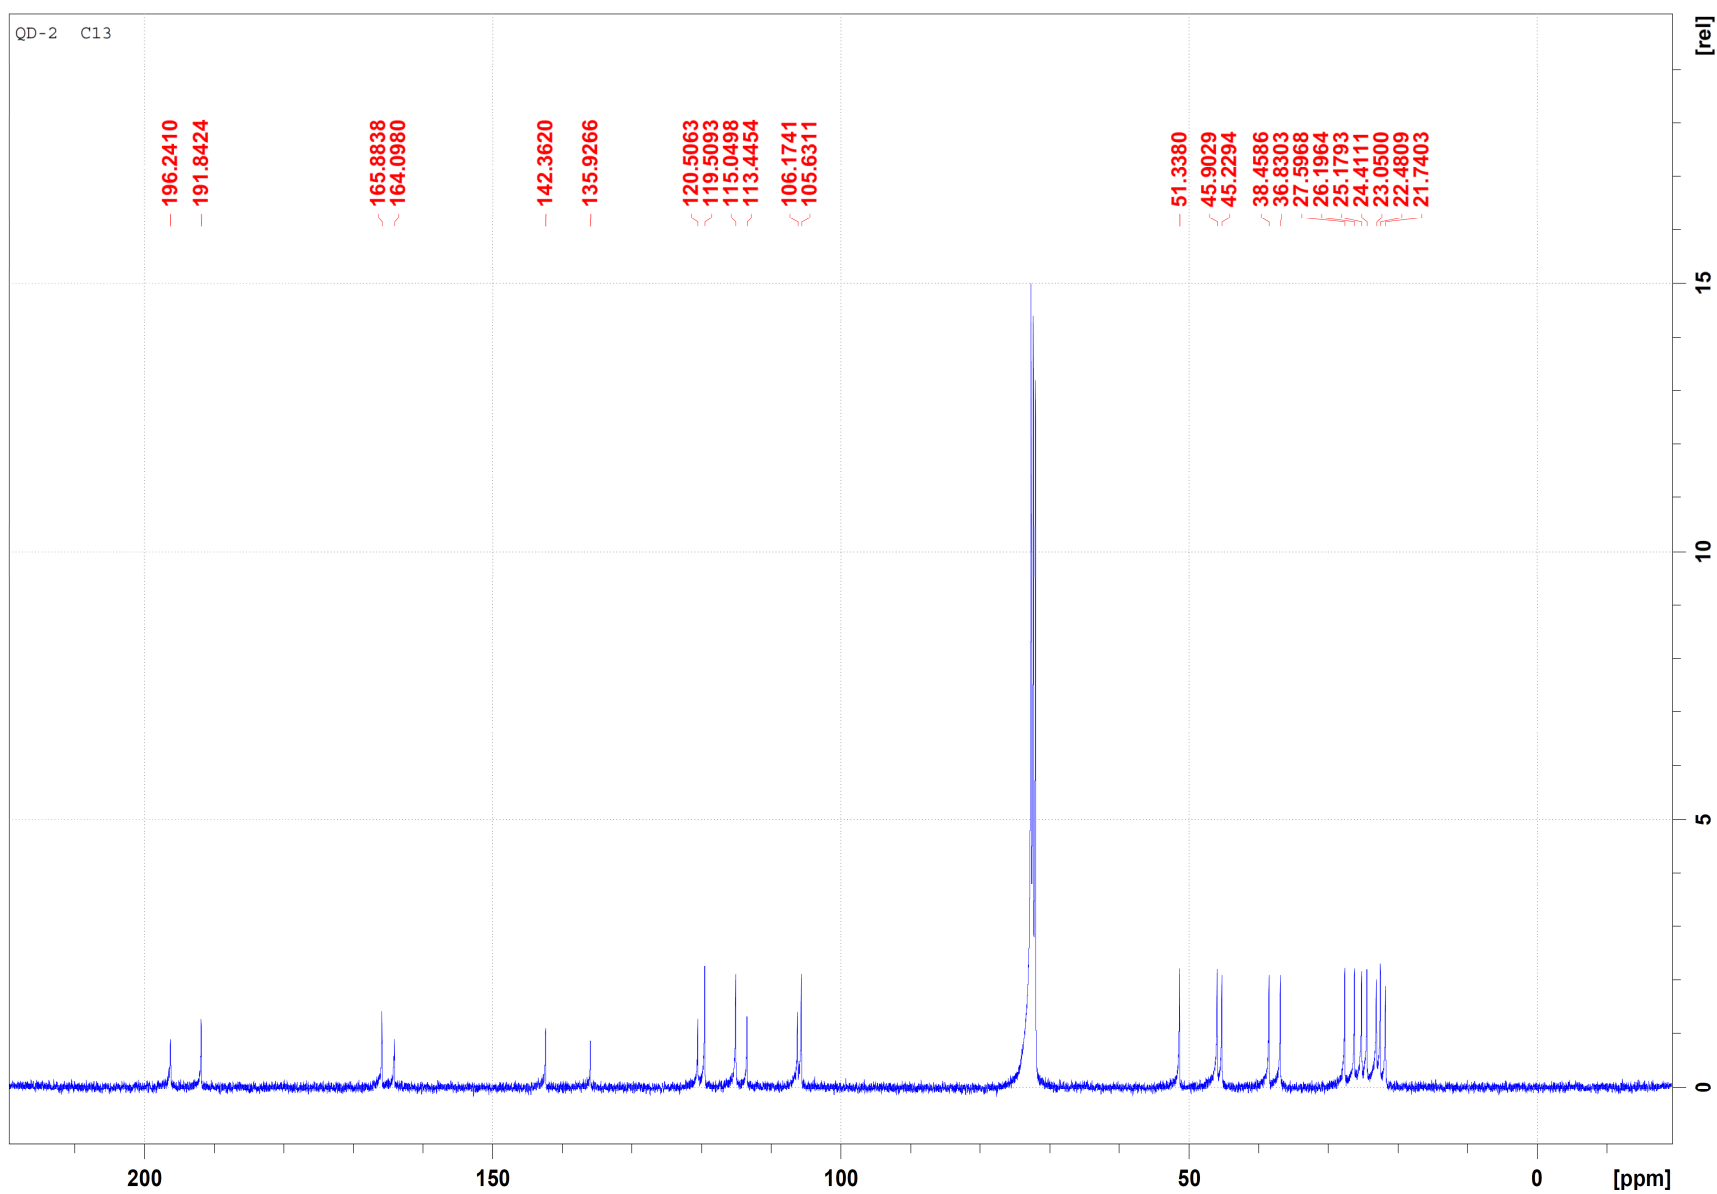

Figure S2.  $^{13}\text{C}$  NMR of compound 4a.

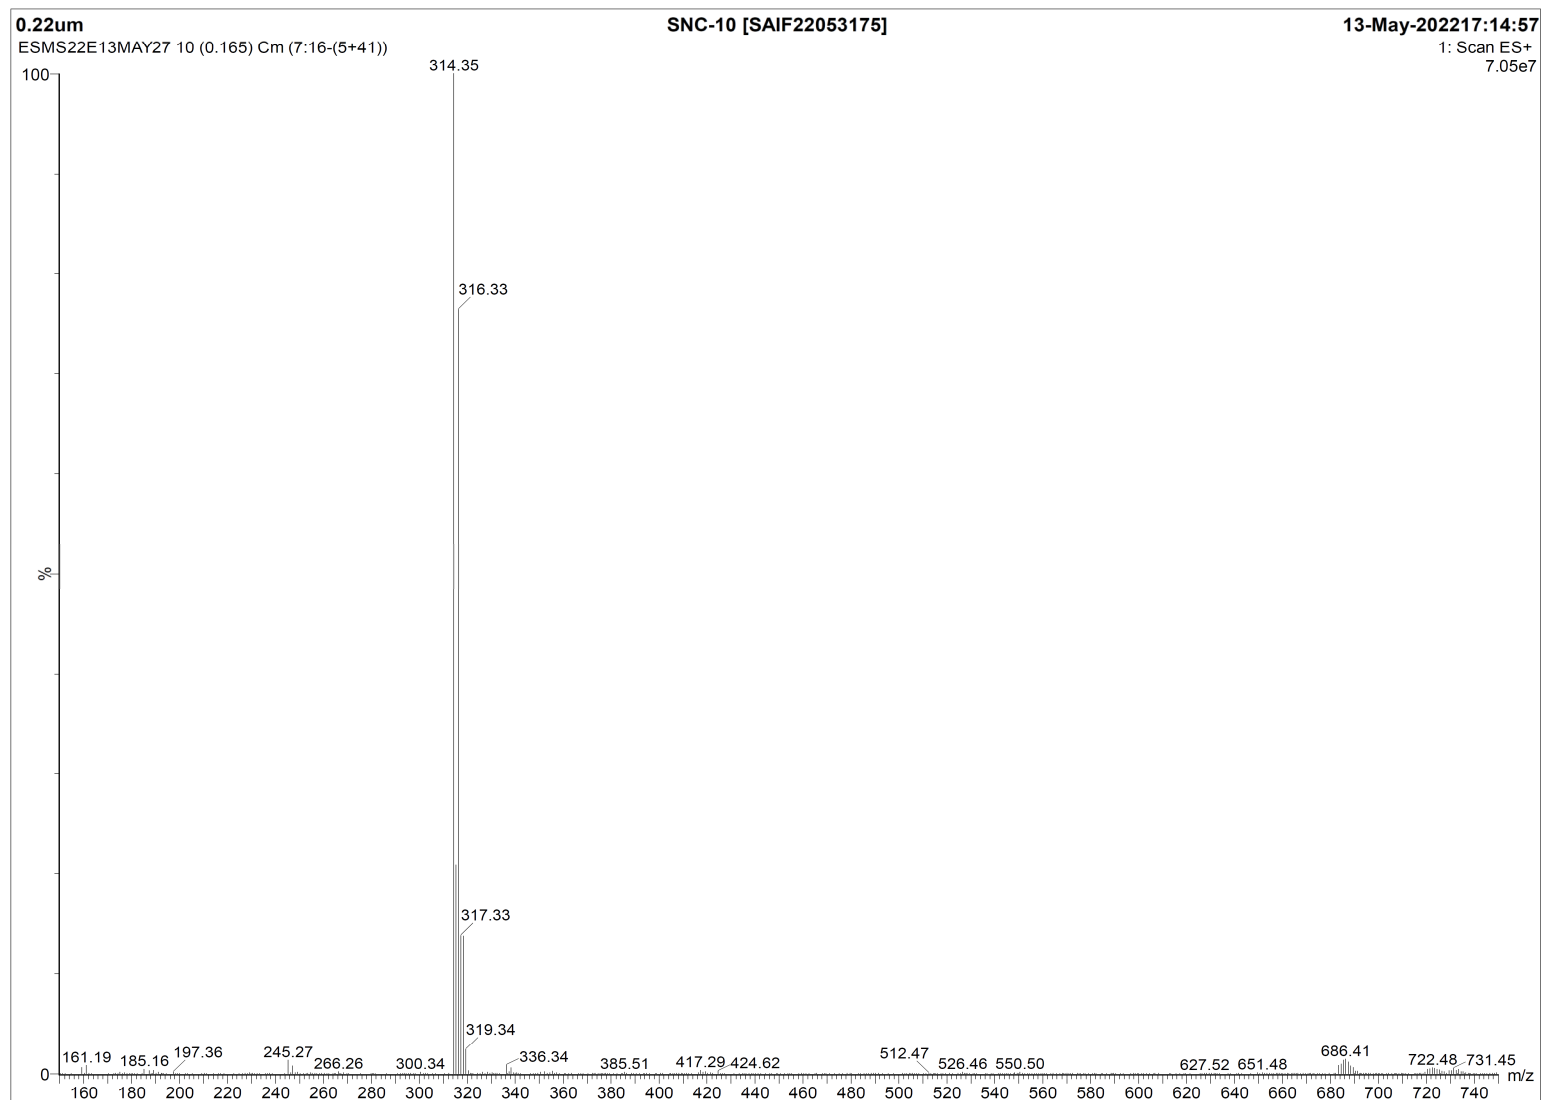

Figure S3. Mass spectra of compound 4a.

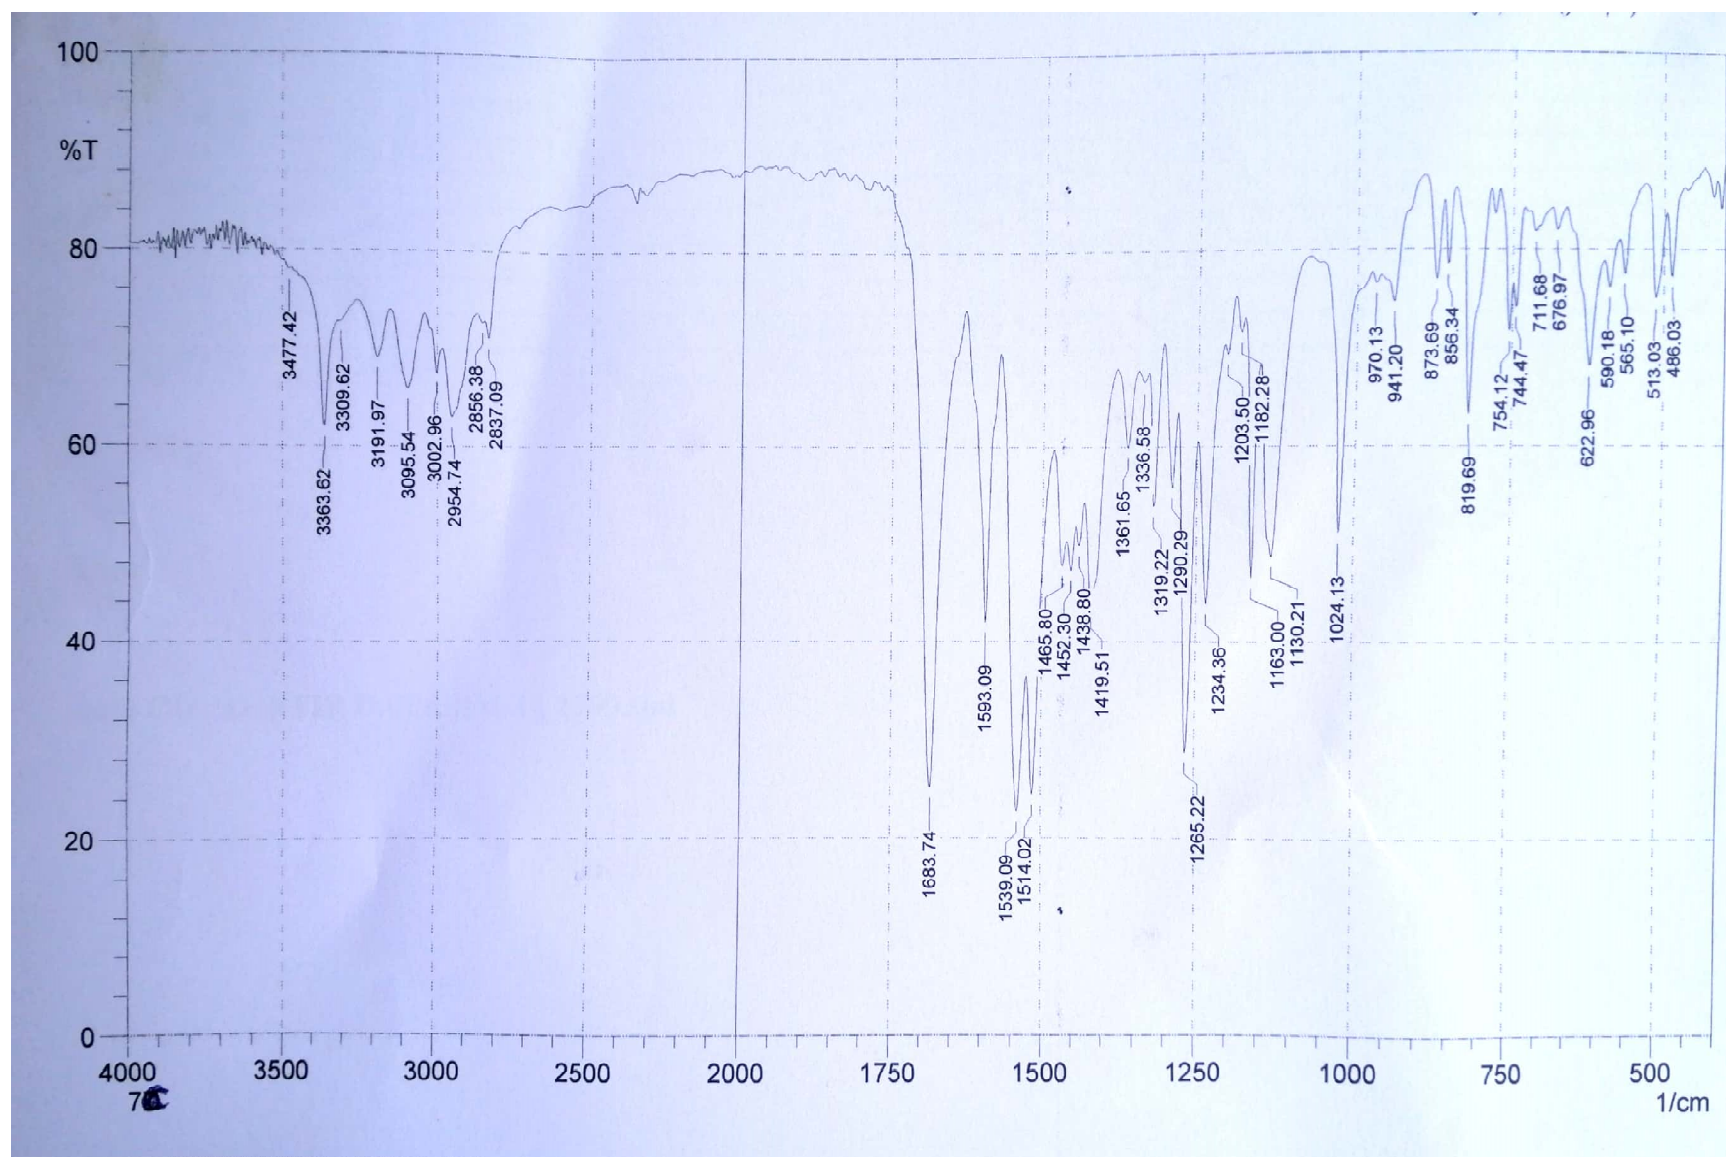

Figure S4. IR spectra of compound 4a.

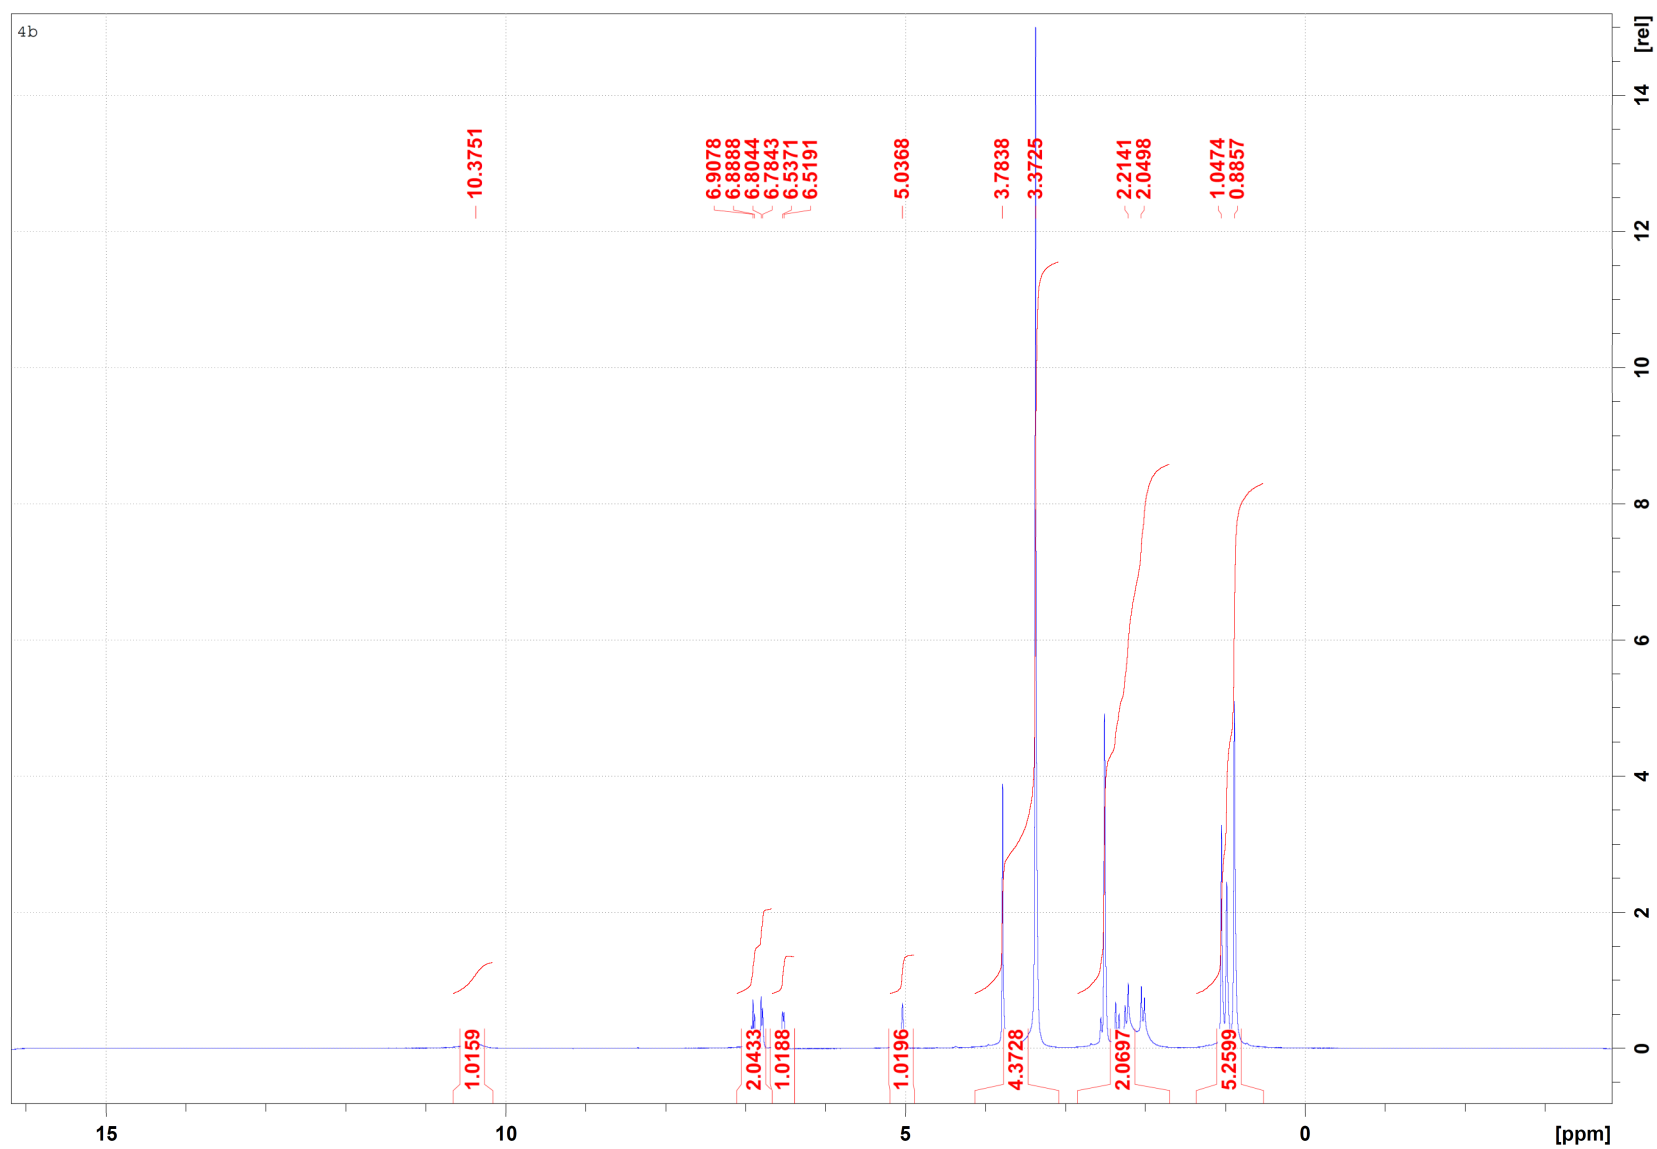

Figure S5.  $^1\text{H}$  NMR spectra of compound 4b.

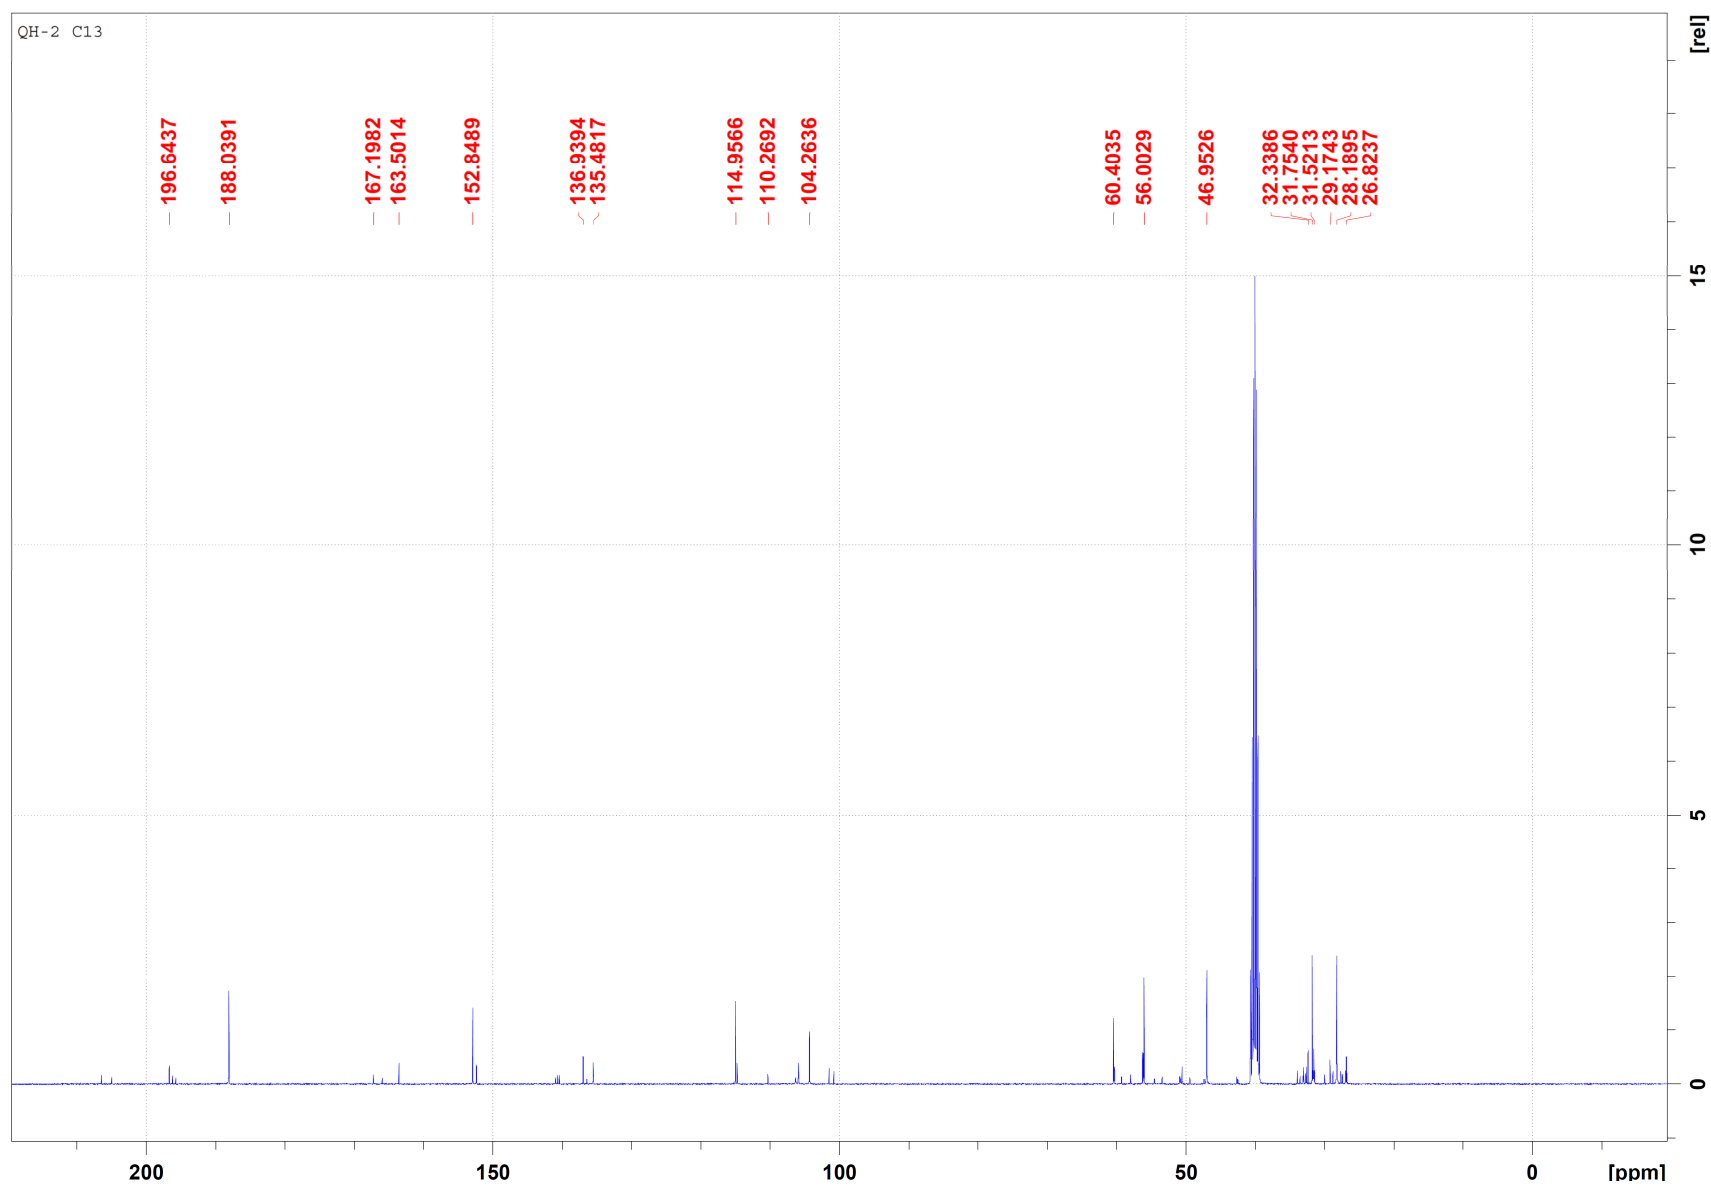

Figure S6.  $^{13}\text{C}$  NMR spectra of compound **4b**.



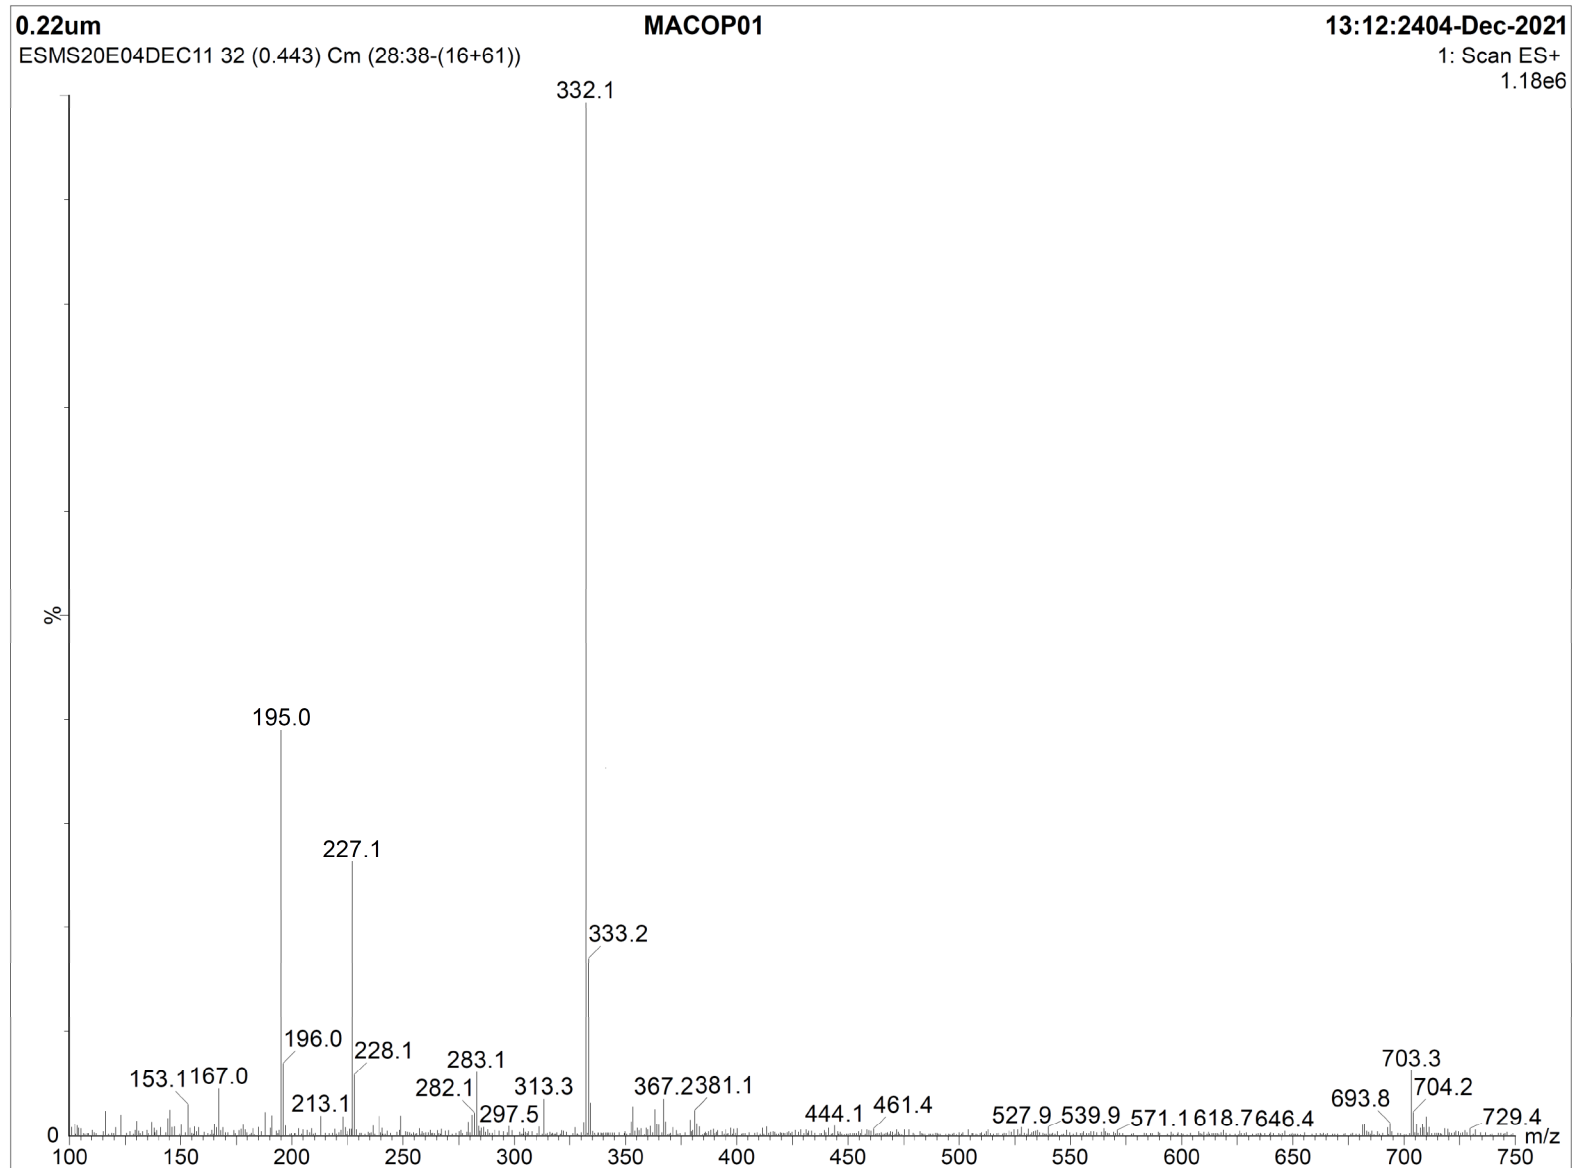

Figure S7. Mass spectra of compound 4b.

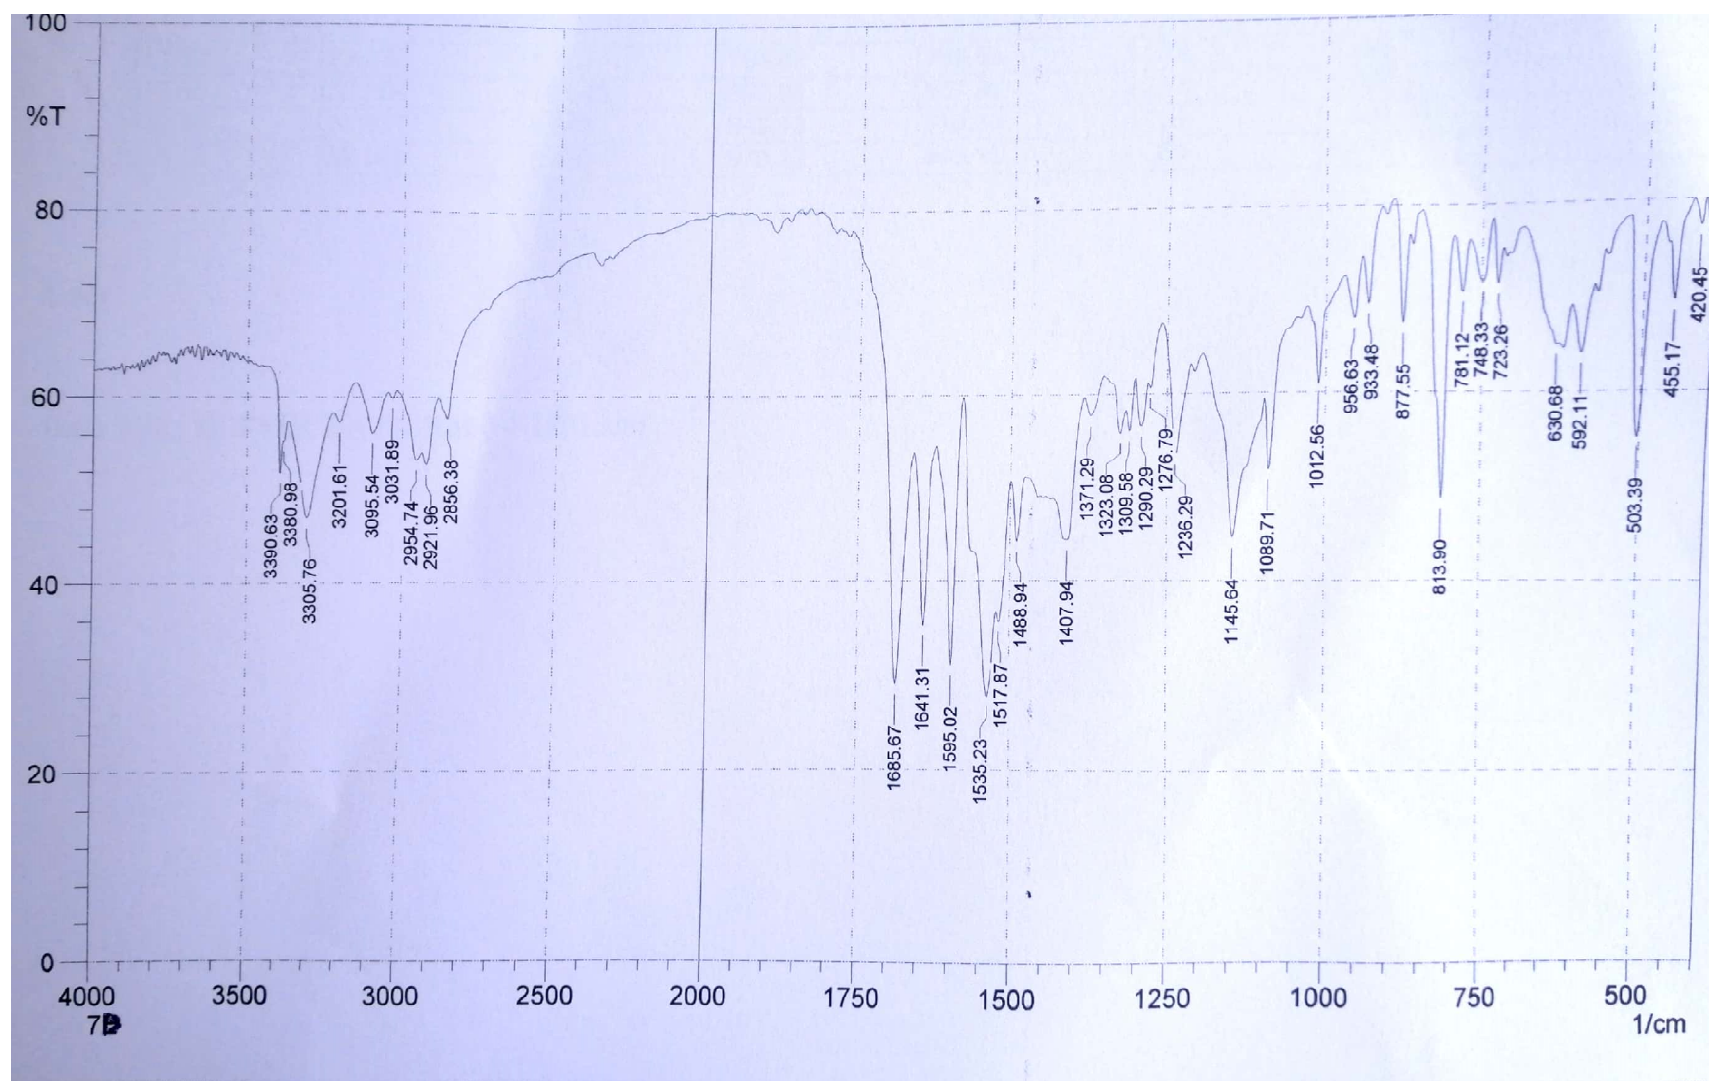

Figure S8. IR spectra of compound 4b.
